1       **Magnitude and kinetics of T cell and antibody responses during**  
2       **H1N1pdm09 infection in outbred and inbred Babraham pigs**

3  
4  
5       Matthew Edmans<sup>1\*</sup>, Adam McNee<sup>1\*</sup>, Emily Porter<sup>2\*</sup>, Eleni Vatzia<sup>1</sup>, Basu Paudyal<sup>1</sup>, Veronica  
6       Martini<sup>1</sup>, Simon Gubbins<sup>1</sup>, Ore Francis<sup>2</sup>, Ross Harley<sup>2</sup>, Amy Thomas<sup>2</sup>, Rachel Burt<sup>2</sup>, Sophie  
7       Morgan<sup>1</sup>, Anna Fuller<sup>3</sup>, Andrew Sewell<sup>3</sup>, sLoLA Influenza Dynamics consortium<sup>4</sup>, Bryan  
8       Charleston<sup>1\*</sup>, Mick Bailey<sup>2\*</sup>, Elma Tchilian<sup>1,5\*</sup>

9  
10  
11       <sup>1</sup>The Pirbright Institute, Pirbright, UK

12       <sup>2</sup>Bristol Veterinary School, University of Bristol, Langford, UK

13       <sup>3</sup>Division of Infection and Immunity, Cardiff University School of Medicine, Cardiff, UK

14  
15  
16       <sup>4</sup>The sLoLa Influenza Dynamics consortium is (in alphabetical order) : Mario Aramouni, Mick  
17       Bailey, Amy Boyd, Sharon Brookes, Ian Brown, Becky Clark, Bryan Charleston, Catherine  
18       Charreyre, Margo Chase-Topping, Federica Di-Palma, Matthew Edmans, Graham  
19       Etherington, Helen Everett, Ore Francis, Simon Frost, Sarah Gilbert, Ross Harley, Barbara  
20       Holzer, Adam McNee, Angela Man, Veronica Martini, Sophie Morgan, Emily Porter, Jin Qi Fu,  
21       Amy Thomas, Elma Tchilian, Laurence Tiley, Pauline van Diemen, James Wood, Fei Xiang.

22  
23  
24       \* These authors contributed equally

25  
26       <sup>5</sup>Corresponding author Elma Tchilian [elma.tchilian@pirbright.ac.uk](mailto:elma.tchilian@pirbright.ac.uk)

27 **Abstract**

28 We have used the pig, a large natural host animal for influenza with many physiological  
29 similarities to humans, to characterize  $\alpha\beta$ ,  $\gamma\delta$  T cell and antibody (Ab) immune responses to  
30 the 2009 pandemic H1N1 virus infection. We evaluated the kinetic of virus infection and  
31 associated response in inbred Babraham pigs with identical MHC (Swine Leucocyte Antigen)  
32 and compared them to commercial outbred animals. High level of nasal virus shedding  
33 continued up to day 4-5 post infection followed by a steep decline and clearance of virus by  
34 day 9. Adaptive T cell and Ab responses were detectable from day 5-6 post infection reaching  
35 a peak at 9-14 days.  $\gamma\delta$  cells produced cytokines *ex vivo* at day 2 post infection, while virus  
36 specific IFN $\gamma$  producing  $\gamma\delta$  T cells were detected from day 7 post infection. Analysis of NP  
37 tetramer specific and virus specific CD8 and CD4 T cells in blood, lung, lung draining lymph  
38 nodes and broncho-alveolar lavage (BAL) showed clear differences in cytokine production  
39 between these tissues. BAL contained the most highly activated CD8, CD4 and  $\gamma\delta$  cells  
40 producing large amounts of cytokines, which likely contribute to elimination of virus. The weak  
41 response in blood did not reflect the powerful local lung immune responses. The immune  
42 response in the Babraham pig following H1N1pdm09 influenza infection was comparable to  
43 that of outbred animals. The ability to utilize these two swine models together will provide  
44 unparalleled power to analyse immune responses to influenza.

## 45 Introduction

46 Influenza viruses are a global health threat to humans and pigs, causing considerable  
47 morbidity and mortality. Frequent zoonotic crossover between pigs and humans contributes  
48 to the evolution of influenza viruses and can be a source for novel pandemic strains (Nelson  
49 and Vincent, 2015; Kaplan et al., 2020; Sun et al., 2020). The emergence of the 2009  
50 pandemic H1N1 (H1N1pdm09) virus, which is now globally endemic in both pigs and humans,  
51 illustrates the importance of pigs in new outbreaks in humans (Smith et al., 2009). Influenza A  
52 virus (IAV) infection in pigs causes significant economic loss due to reduced weight gain,  
53 suboptimal reproductive performance and secondary infections. Immunization with inactivated  
54 influenza virus is currently the most effective way of inducing strain-specific neutralizing  
55 antibodies, directed against the surface glycoprotein haemagglutinin (HA). Because of the  
56 constant evolution of the virus, broadly cross-protective vaccines would be highly desirable  
57 and central to the control of influenza in both pigs and humans.

58 Animal models are essential to develop better vaccines and control strategies and to  
59 provide insight into human disease. Most models have limitations in recapitulating the full  
60 range of disease observed in humans. Mice, guinea pigs and non-human primates are not  
61 generally susceptible to natural routes of influenza infection and may require adapted strains,  
62 physiologic stressors and/or unnatural inoculation procedures (Bouvier and Lowen, 2010;  
63 Margine and Krammer, 2014; Hemmink et al., 2018; Mifsud et al., 2018). In contrast, pigs are  
64 an important, natural, large animal host for IAV and are infected by the same subtypes of  
65 H1N1 and H3N2 viruses as humans (Watson et al., 2015; Lewis et al., 2016). Pigs have a  
66 longer life span, are genetically, immunologically, physiologically and anatomically more like  
67 humans than small laboratory animals and have a comparable distribution of sialic acid  
68 receptors in the respiratory tract (Janke, 2014; Rajao and Vincent, 2015). Pigs exhibit similar  
69 clinical manifestations and pathogenesis when infected with IAV making them an excellent  
70 model to study immunity to influenza. Furthermore, we have defined the dynamics of  
71 H1N1pdm09 influenza virus transmission in pigs and demonstrated the utility of the pig model  
72 to test therapeutic antibody delivery platforms and vaccines (Canini et al., 2020; McNee et al.,  
73 2020).

74 Several inbred miniature pig breeds have been developed, including NIH and Yucatan,  
75 with defined swine leukocyte antigens (SLA type, the swine major histocompatibility complex)  
76 (Sachs et al., 1976; Choi et al., 2016). However, the inbred Babraham is the only example of  
77 a full-size inbred strain of pig, closely related to commercial breeds, making them an  
78 appropriate model to study diseases important to commercial pig production (Signer et al.,  
79 1999; Schwartz et al., 2018). The sharing of IAV strains between pigs and humans makes it  
80 an obvious species in which to study immunity to influenza and to test vaccines or therapeutic

81 strategies prior to human clinical trials. In addition we have developed a toolset to study  
82 immune responses in Babrahams, including adoptive cell transfer and peptide SLA tetramers  
83 allowing us to study the fine specificity of immune responses (Binns et al., 1981; Tungatt et  
84 al., 2018).

85 Despite extensive knowledge of the role of T cells in protection against IAV in mice  
86 and humans, few studies in pigs have evaluated this in depth. The duration and magnitude of  
87 T cell and humoral responses has been assessed after swine H1N1, H1N2 and H3N2  
88 challenges in pigs (Heinen et al., 2000; Larsen et al., 2000; Khatri et al., 2010; Talker et al.,  
89 2015; Talker et al., 2016). The frequency and activation status of leucocytes in local and  
90 systemic tissues was also determined after H1N1pdm09 infection (Schwaiger et al., 2019).  
91 However no detailed analysis of T cell immune responses in broncho-alveolar lavage (BAL)  
92 have been performed, a location which we have shown to contain tissue resident memory  
93 cells that are essential for heterosubtypic protection (Holzer et al., 2018a). Neither has there  
94 been a detailed analysis of T cell and antibody (Ab) immune responses to H1N1pdm09,  
95 although this continues to cross the species barrier from humans to pigs. H1N1pdm09  
96 circulating in swine herds maintains antigenic similarity to human seasonal strains, providing  
97 a unique opportunity to use a virus affecting both humans and swine to examine immune  
98 responses induced by infection.

99 Here we characterized  $\alpha\beta$ ,  $\gamma\delta$  T cell and Ab immune responses to H1N1pdm09 in local  
100 lung and systemic tissues in Babraham pigs and compared them to commercial outbred  
101 animals. These two pig models together will allow fine grain dissection of immune responses  
102 to IAV in a species which is a natural host for the virus and similar in many respects to humans.

103

## 104 **Materials and methods**

105 **Animals and influenza H1N1pdm09 challenge.** The animal experiments were approved by  
106 the ethical review processes at the Pirbright Institute and Bristol and conducted according to  
107 the UK Government Animal (Scientific Procedures) Act 1986 under project licence  
108 P47CE0FF2. Both Institutes conform to the ARRIVE guidelines.

109 Thirty two outbred old Landrace x Hampshire cross (from a commercial high health  
110 status herd) and 56 inbred Babraham pigs (bred at Animal Plant Health Agency, APHA  
111 Weybridge, UK) were screened for absence of influenza A infection by matrix gene real time  
112 RT-PCR and for antibody-free status by HAI using four swine influenza virus antigens -  
113 H1N1pdm09, H1N2, H3N2 and avian-like H1N1. The average age of the outbred pigs 7 days  
114 before the challenge was 8.7 weeks and of the Babrahams 8.3 weeks. Pigs were challenged  
115 intra-nasally with  $1 \times 10^7$  PFU of MDCK grown swine A(H1N1)pdm09 isolate,  
116 A/swine/England/1353/2009, derived from the 2009 pandemic virus, swine clade 1A.3.

117 (H1N1pdm09) in a total of 4 ml (2 ml per nostril) using a mucosal atomisation device MAD300  
118 (MAD, Wolfe-Tory Medical). Two experiments with outbred (OB) pigs (referred to as OB1 and  
119 OB2) and two with inbred Babraham (BM) pigs (referred to as BM1 and BM2) were performed  
120 (**Fig. 1A**). In each experiment one pig was culled on days 1 to 7, 9, 11 and 13 post infection  
121 and a *post-mortem* examination performed with collection of tissue samples. Uninfected  
122 controls were sampled: two on the day prior to infection and two at day 8 post infection. Two  
123 naïve pigs (referred to as in-contact) were co-housed with the directly challenged pigs in  
124 experiments OB1, OB2, BM1, BM2 and culled at days 11 and 13 post infection together with  
125 the last two directly challenged pigs. A fifth experiment was performed with Babraham pigs  
126 (experiment BM3) in which 3 were culled on days 6, 7, 13, 14, 20 and 21 post infection (**Fig.**  
127 **1A**). In the BM3 experiment 6 control animals were included, 3 of which were culled one day  
128 before and 3 on the day of infection.

129

130 **Tissue sample and processing** Two nasal swabs (one per nostril) were taken from all  
131 surviving pigs following infection with H1N1pdm09 (**Fig. 1**) on days 1 to 7, 9, 11 and 13 in  
132 OB1, OB2, BM1 and BM2, and on days 1 to 9 in BM3. Animals were humanely euthanized at  
133 the indicated times with an overdose of pentobarbital sodium anaesthetic. Peripheral blood  
134 (P BMC), tracheobronchial lymph nodes (TBLN), lung, bronchial alveolar lavage (BAL) were  
135 processed as previously described (Morgan et al., 2016b; Holzer et al., 2018b). The tissue  
136 homogenate was washed, red blood cells lysed and cell suspension passed through 100µM  
137 cell strainer twice. Cells were cryopreserved in FBS containing 10% DMSO.

138

139 **Plaque assays.** Virus titer in nasal swabs was determined by plaque assay on MDCK cells  
140 (Central Service Unit, The Pirbright Institute, UK). Samples were 10-fold serially diluted in  
141 Dulbecco's Modified Eagle's Medium (DMEM) and 200µl overlaid on confluent MDCK cells  
142 in 12 well tissue culture plates. After 1 hour, the plates were washed and overlaid with 2ml  
143 of culture medium containing 0.66 % Agar. Plates were incubated at 37°C for 48 to 72 hours  
144 and plaques visualized using 0.1% crystal violet. plaques were counted at the appropriate  
145 dilution and expressed as plaque forming units (PFU) per ml of nasal swab.

146

147 **IFN $\gamma$  ELISpot assay.** Frequencies of IFN $\gamma$  spot forming cells (SFC) were determined using  
148 cryopreserved cells a previously described (Morgan et al., 2016a; Holzer et al., 2018a). Cells  
149 were stimulated with live MDCK-grown H1N1pdm09 (MOI 1), medium control, or 4 µg/ml Con  
150 A (Sigma-Aldrich). Results were expressed as number of IFN $\gamma$  producing cells per 10<sup>6</sup> cells  
151 after subtraction of the average number of spots in medium control wells.

152

153 **Flow cytometry.** Cryopreserved single cell suspensions from blood, TBLN, BAL and lung  
154 were thawed, rested for 1-2 hours and aliquoted into 96 well plates at  $1 \times 10^6$  cells/ well. Cells  
155 were stimulated with live MDCK-grown H1N1pdm09 (MOI 1) or medium control and incubated  
156 at 37°C for 18 hours. Golgi plug (BD Biosciences) was added for the last 4 hours of stimulation.  
157 PMA Ionomycin (Biolegend) was added to appropriate control wells as a positive control at  
158 the same time as the Golgi plug. Following incubation cells were washed at 1000 x g for 5  
159 minutes and re-suspended followed by addition of primary antibodies, Near-Infrared Fixable  
160 LIVE/DEAD stain (Invitrogen) and secondary antibodies (**Table 3**). Cells were fixed and  
161 permeabilised with BD Fix and perm buffer (BD Biosciences) as per the manufacturer's  
162 instructions prior to the addition of internal cytokine antibodies. Cells were washed and re-  
163 suspended in PBS prior to analysis using a MACSquant analyser10 (Miltenyi).

164 The NP<sub>290-298</sub> SLA tetramer binding was performed as previously described (Tungatt et  
165 al., 2018). Briefly, biotinylated NP peptide loaded SLA monomers, were freshly assembled  
166 into tetramer with streptavidin BV421 (Biolegend, UK) and diluted with PBS to a final  
167 concentration of 0.1 µg/µl. Two million mononuclear cells were incubated with protease kinase  
168 inhibitor (Dasatinib, Axon Medchem) in PBS for 30 minutes at 37°C and 0.3 µg of tetramer  
169 was added to the cells on ice for another 30 minutes. Surface staining with optimal antibody  
170 concentrations in FACS buffer (PBS supplemented with 2% FCS and 0.05% sodium azide)  
171 was performed on ice for 20 minutes (**Table 1**). Samples were washed twice with FACS buffer  
172 and fixed in 1% paraformaldehyde before analysis on MACSquant analyser10 (Miltenyi). All  
173 flow cytometry data was analysed by Boolean gating using FlowJo v10.6 (TreeStar, US).

174

175 **Serological assays.** ELISA was performed using live H1N1pdm09 virus or recombinant  
176 haemagglutinin from H1N1pdm09 (pH1) containing a C-terminal thrombin cleavage site, a  
177 trimerization sequence, a hexahistidine tag and a BirA recognition sequence as previously  
178 described (Huang et al., 2015). Cut-off values determined as average naïve values plus three-  
179 fold standard deviation at optimal starting dilution. Starting dilutions were 1:20, 1:2 and 1:4 for  
180 serum, BAL and nasal swab respectively. Hemagglutination inhibition (HAI) Ab titers were  
181 determined using 0.5% chicken red blood cells and H1N1pdm09 at a concentration of 4 HA  
182 units/ml. Microneutralization (MN) was performed using standard procedures as described  
183 previously (Powell et al., 2012; McNee et al., 2020).

184 The porcine sera were also tested for binding to MDCK-SIAT1 cells stably expressing  
185 pH1 from H1N1pdm09 (A/England/195/2009), H1 from A/Puerto Rico/8/1934 (PR8, H1N1)  
186 and H5 HA (A/Vietnam/1203/2004). Confluent cell monolayers in 96-well microtiter plates  
187 were washed with PBS and 50 µl of the serum dilution was added for 1 h at room temperature.  
188 The plates were washed three times with PBS and 100 µl of horseradish peroxidase (HRP)-

189 conjugated goat anti-pig Fc fragment secondary antibody (Bethyl Laboratories, diluted in PBS,  
190 0.1% BSA) was added for 1 h at room temperature. The plates were washed three times with  
191 PBS and developed with 100 µl/well TMB high sensitivity substrate solution (Biolegend). After  
192 5 to 10 min the reaction was stopped with 100 µl 1M sulfuric acid and the plates were read at  
193 450 and 570 nm with the Cytation3 Imaging Reader (Biotek). The cut off value was defined as  
194 the average of all blank wells plus three times the standard deviation of the blank wells.

195

196 **Enzyme-linked lectin Assay (ELLA).** Neuraminidase inhibiting Ab titres were determined in  
197 serum and BAL fluid using an Enzyme-linked lectin assay (ELLA). Ninety six-well microtiter  
198 plates (Maxi Sorp, Nunc, Sigma-Aldrich, UK) were coated with 50 µl/well of 25 µg/ml fetuin  
199 and incubated at 4°C overnight. Heat inactivated sera samples were serially diluted in a  
200 separate 96-well plate. An equal volume of (H7(Net219) N1(Eng195) S-FLU (H7N1 S-FLU)  
201 (kindly provided by Professor Alain Townsend, University of Oxford) was added to each well  
202 and incubated at room temperature on a rocking platform for 20 minutes. The H7N1 S-FLU  
203 was titered beforehand in the absence of serum to determine optimal concentration for the  
204 assay. Fetuin plates were washed with PBS four times before 100 µl/well of the serum/virus  
205 mix was transferred and incubated overnight at 37°C. The serum/virus mix was removed, and  
206 the plate washed four times with PBS before adding 50µl/well of Peanut Agglutinin-HRP at 1  
207 µg/ml and incubating for 90 minutes at room temperature on a rocking platform. Plates were  
208 washed and 50 µl/well of TMB High Sensitivity substrate solution (BioLegend, UK) was added.  
209 Plates were developed for 6 minutes, the reaction stopped with 50 µl of 1M H<sub>2</sub>SO<sub>4</sub> and the  
210 plates were read at 450 and 630 nm using a Biotek Elx808 reader. Samples were measured  
211 as end titre representing the highest dilution with signal greater than cut-off. The cut off value  
212 was defined as the average of all blank wells plus three times the standard deviation of the  
213 blank wells.

214

215 **B cell ELISpot.** B cell ELISpots were performed for the detection and enumeration of  
216 antibody-secreting cells in single cell suspensions prepared from different tissues and  
217 peripheral blood. ELISpot plates (Multi Screen-HA, Millipore, UK) were coated with 100 µl per  
218 well of appropriate antigen or antibody diluted in carbonate/bicarbonate buffer for 2h at 37°C.  
219 To detect HA-specific spot-forming cells, plates were coated with 2.5 µg per well of  
220 recombinant pHA from H1N1pdm09 (A/England/195/2009) and for the enumeration of total  
221 IgG-secreting cells with 1 µg per well of anti-porcine IgG (mAb, MT421, Mabtech AB, Sweden)  
222 or with culture medium supplemented with 10% FBS (media background control). The coated  
223 plates were washed with PBS and blocked with 200 µl/well 4% milk (Marvel) in PBS. Frozen  
224 cell suspensions from different tissues were filtered through sterile 70 µM cell strainers, plated  
225 at different cell densities in culture medium (RPMI, 10% FBS, HEPES, Sodium pyruvate,

226 Glutamax and Penicillin/Streptomycin) on the ELISPOT plates and incubated for a minimum  
227 of 18 h at 37°C in a 5% CO<sub>2</sub> incubator. After incubation the cell suspension was removed, the  
228 plates washed once with ice-cold sterile H<sub>2</sub>O and thereafter with PBS/0.05 % Tween 20, before  
229 incubation with 100 µl per well of 0.5 µg/ml biotinylated anti porcine IgG (mAb, MT424,  
230 Mabtech AB, Sweden) diluted in PBS/0.5 % FBS for two hours at room temperature. Plates  
231 were washed with PBS/0.05% Tween 20 and incubated with streptavidin – alkaline  
232 phosphatase conjugate (Strep-ALP, Mabtech AB, Sweden). After a final wash, the plates were  
233 incubated with AP Conjugate Substrate (Bio-Rad, UK) for a maximum of 30 min. The reaction  
234 was stopped by rinsing the plates in tap water and dried before spots were counted.

235

236 **Statistical analysis.** All statistical analysis was performed using Prism 8.1.2. The kinetics of  
237 viral shedding were analysed using a linear mixed model. The model included viral titre (log<sub>10</sub>  
238 PFU/ml) as the response variable, day post infection (as a categorical variable) and pig type  
239 (OB or BM) and an interaction between them as fixed effects and pig ID nested in experiment  
240 as random effects. The model was implemented using the lme4 package (Bates et al., 2015)  
241 in R (version 3.6.1) (<https://www.R-project.org/>)

242 ELISpot data were analysed using a linear model. The model included log<sub>10</sub> SFC/10<sup>6</sup>  
243 cells+1 as the response variable and day post infection (as a categorical variable), source  
244 (BAL, lung, PBMC, TBLN) and pig type (OB or BM) and two- and three-way interactions  
245 between them as fixed effects. Model simplification proceeded by stepwise deletion of non-  
246 significant (P>0.05) terms as judged by *F*-tests. The model was implemented in R (version  
247 3.6.1).

248 Because of possible non-normality and non-constant variance the percentage of  
249 different T cells (NP<sub>290-298</sub> CD8, IFN<sub>γ</sub> CD8<sub>β</sub>, IL-2 CD8<sub>β</sub>, TNF CD8<sub>β</sub>, IFN<sub>γ</sub> CD4, IL-2 CD4, TNF  
250 CD4, IFN<sub>γ</sub> CD2 γδ *ex vivo*, TNF CD2 γδ *ex vivo*, IFN<sub>γ</sub>/TNF CD2 γδ *ex vivo*, IFN<sub>γ</sub> CD2 γδ, TNF  
251 CD2 γδ, IL-17A CD2 γδ) from each source (BAL, lung, PBMC, TBLN) and pig type (OB and  
252 BM) at each day post infection were analysed using Kruskal-Wallis tests. If significant  
253 (P<0.05), pairwise Mann-Whitney-Wilcoxon tests were used to compare groups. These  
254 analyses were implemented in R (version 3.6.1). A similar approach was used to compare the  
255 percentage of different T cells in all sources from inoculated and uninfected control pigs at  
256 each time point and in BAL from in-contact and experimentally-inoculated pigs (in this case  
257 observations from 6-11 dpi were combined).

258 The dynamics of antibody responses were analysed by fitting logistic growth curves to  
259 the data,  $y = \kappa / (1 + \exp(-\beta(t - \delta)))$ , where *y* is the log<sub>10</sub> antibody titre, *t* is days post infection, *κ* is  
260 the upper asymptote, *β* is the rate of increase and *δ* is the time of maximum increase. The



261 parameters (i.e.  $\kappa$ ,  $\beta$  and  $\delta$ ) were allowed to vary between BM and OB pigs. Model fitting using  
262 the nlme package (<https://CRAN.R-project.org/package=nlme>) in R (version 3.6.1).

263

## 264 Results

265 **Experimental design, virus shedding and lymphocyte dynamics during H1N1pdm09**  
266 **infection.** Five experiments were performed to characterise local and systemic immune  
267 responses. In the first four experiments ten pigs were infected intranasally with H1N1pdm09  
268 virus and monitored for clinical signs. One infected pig was culled on each of days 1 to 7, 9,  
269 11 and 13 post infection. A full post-mortem examination was performed and BAL, lung, TBLN  
270 and PBMC samples collected. Four uninfected controls were sampled in parallel, two on the  
271 day prior to infection and two at day 8 post infection. Two experiments with outbred (OB) pigs  
272 (referred to as experiments OB1 and OB2) and two with inbred Babraham (BM) pigs (referred  
273 to as BM1 and BM2) were performed (**Fig. 1A**). In addition, 2 naïve pigs (referred to as in-  
274 contact pigs) were co-housed with the directly challenged pigs in experiments OB1, OB2,  
275 BM1, BM2 and culled at days 11 and 13 post contact. A fifth experiment was carried out with  
276 18 BM (experiment BM3) in which 3 pigs were culled on each of days 6, 7, 13,14, 20 and 21  
277 post infection (**Fig. 1A**). In the BM3 experiment six uninfected controls were sampled, 3 one  
278 day before and 3 on the day of infection.

279 Viral load was determined in daily nasal swabs taken from both the directly challenged  
280 and in-contact pigs (**Fig. 1B**). In directly challenged pigs, peak virus load was reached 1 to 3  
281 days post infection (DPI), declined sharply after 4 DPI and was not detectable after 7 DPI. No  
282 differences in virus shedding between OB and BM were detected ( $p=0.65$ ). Although the onset  
283 of viral shedding was delayed, most in-contact pigs showed similar kinetics to directly  
284 challenged ones, indicating that the natural contact infection is very similar to intra-nasal  
285 challenge with mucosal atomization device (MAD).

286 We determined the proportion of CD8 $\beta$ , CD4 and  $\gamma\delta$  cells over the time course in BAL,  
287 lung, TBLN and PBMC (**Fig. 1C, Suppl Fig1**). BM animals had a significantly lower proportion  
288 of CD8 $\beta$  T cells than OB, apparent in all tissues in naïve unexposed animals (6.6% in BM vs  
289 24.2% in OB in BAL, 4.2% vs 16.2% in lung, 3.2% vs 9.4% in PBMC and 7.6% vs 11.5% in  
290 TBLN) (**Suppl Fig. 1A**). BM animals also showed a significantly higher proportion of  $\gamma\delta$  T cells  
291 in BAL, lung and PBMC (**Suppl Figure 1A**). No significant differences in CD4 T cells were  
292 detected between OB and BM. The proportion of CD4, CD8 and  $\gamma\delta$  cells did not change  
293 significantly over the time course of H1N1pdm09 infection, although an increase in the  
294 proportion of CD8 $\beta$  in the BAL for the BM animals was observed, as previously reported  
295 (Khatri et al., 2010).

296 Overall the kinetic of virus infection and shedding were similar between BM and OB,  
297 although there were differences in the proportions of proportions of CD8 and  $\gamma\delta$  cells.

298

299 **T cell responses during H1N1pdm09 infection in pigs.** As T cells are crucial for control of  
300 virus replication, we examined in detail the CD8 and CD4 responses during H1N1pdm09  
301 infection (McMichael et al., 1983; Sridhar et al., 2013; Hayward et al., 2015; Holzer et al.,  
302 2019). First, we enumerated IFN $\gamma$  secreting cell by ELISpot following re-stimulation with  
303 H1N1pdm09 (**Figs. 2A and B**). IFN $\gamma$  spot forming cells (SFC) were detectable from 6 DPI and  
304 maintained in all tissues until 21 DPI. During the early stage of infection the strongest  
305 responses were in the TBLN (mean 474 SFC/10<sup>6</sup> cells at 7 DPI), whereas from 14 to 21 DPI  
306 the highest number of IFN $\gamma$  secreting cells was detected in the lung, with SFC continuing to  
307 expand in this tissue (mean 368 SFC/10<sup>6</sup> cells at 14 DPI and 972/10<sup>6</sup> cells SFC at 21 DPI).  
308 The response in the BAL was lower than lung ( $p=0.04$ ), due to the low proportion of T cells  
309 present in the BAL (**Fig. 1C**). The IFN $\gamma$  ELISpot response in the PBMC was low with a peak  
310 of 296 SFC/10<sup>6</sup> cells at 13 DPI. No differences in responses between the same tissues in OB  
311 and BM were detected ( $p>0.11$ ).

312 To further dissect the T cell response, we enumerated antigen specific cytotoxic  
313 CD8 $\beta$  T cells against the nuclear protein (NP) using peptide NP<sub>290-298</sub> (DFEREGYSL) tetramer,  
314 which we have previously shown to be dominant in BM animals infected with H1N1pdm09  
315 (Tungatt et al., 2018). Tetramer responses were measured in experiments BM1, BM2 and  
316 BM3 (**Suppl Fig 1B, Figs. 2C and D**). NP<sub>290-298</sub> responses were detected in BAL and lung at  
317 6 DPI, reaching a peak at 9 DPI and still present at 20 - 21 DPI. In TBLN one animal responded  
318 at 5 DPI, but the peak was at 9 - 11DPI and still present at 21 DPI. The responses in PBMC  
319 were low (0.2% at 6 DPI) and there were no detectable responses at 20-21 DPI (**Table 1**).

320

321 **Cytokine production by CD4 and CD8 T cells.** We analysed production of IFN $\gamma$ , TNF and  
322 IL-2 by CD8 $\beta$  and CD4 cells by intracellular staining (ICS) (**Suppl Fig. 2A**). The kinetics of the  
323 CD8 cytotoxic T cell response was similar when analysed by ICS, ELISpot and tetramer  
324 binding. There was a minimal response up to 5 - 6 DPI, followed by a marked increase in  
325 cytokine-producing T cells particularly in the BAL (peak of 7.9% IFN $\gamma$  and 7.6% TNF at 9 DPI)  
326 and lung (peak of 1.3% IFN $\gamma$  and 0.6% TNF at 9 DPI). CD8 T-cells produced minimal IL-2 in  
327 all tissues except for BAL, where 0.7% to 1.3% positive cells were detected between 7-13 DPI.  
328 PBMC had much lower proportion of cytokine producing CD8 cells with maximum 0.3% IFN $\gamma$   
329 and 0.2% TNF production in PBMC at 9 DPI. The high cytokine responses were maintained  
330 in BAL and lung until 21 DPI, with lower responses in the TBLN and none in PBMC (**Fig. 3**).

331 We next determined the quality of cytokine responses of CD8 $\beta$  cells. The CD8 $\beta$  T-cell  
332 cytokine response was dominated by IFN $\gamma$  single producing cells with some IFN $\gamma$ /TNF double  
333 producing cells also present in all tissues (**Fig. 3A**). However, the highest proportion of double  
334 IFN $\gamma$ /TNF producing cells was present in the BAL (**Table 1**). A triple secreting IFN $\gamma$ / IL-2/TNF  
335 population was detected only in the BAL and these cells produced greater levels of IFN $\gamma$  per  
336 cell as measured by MFI (**Suppl Fig. 2B**). The individual cytokine profiles of the BM and OB  
337 were similar during the time course of H1N1pdm09 infection and shown in **Suppl Fig. 3**. We  
338 also analysed the responses in the in-contact animals from experiments OB1, OB2, BM1 and  
339 BM2. These animals had the same profiles of cytokine production in BAL (**Suppl Fig. 4**) and  
340 in the other tissues (data not shown) as directly challenged animals (**Table 2**).

341 The CD4 response was lower than the CD8 and developed earlier at 4 -5 DPI in some  
342 animals (**Fig. 4**). It was greatest in the BAL and peaked at 9 DPI similarly to CD8 (1.6% IFN $\gamma$   
343 and 2.1% TNF) and almost disappeared by 21 DPI. The CD4 response was lower in TBLN,  
344 lung and PBMC (**Table 1**). CD4 cytokine secretion differed between tissues. Single cytokine-  
345 secreting IFN $\gamma$  and TNF CD4 cells were dominant in the lung and TBLN respectively, while in  
346 the BAL and PBMC both single IFN $\gamma$ , single TNF and double IFN $\gamma$ /TNF were present. The  
347 individual cytokine profiles of the BM and OB animals were comparable (**Suppl Fig. 3**). The  
348 in-contacts also showed a similar pattern of cytokine production except for TNF (**Suppl Fig.**  
349 **4, Table 2**).

350 These results demonstrate that there is a strong antigen specific CD8 response in the  
351 local lung tissues and in particularly in the BAL. Cytokine production by CD8 was dominated  
352 by IFN $\gamma$  and TNF, but the BAL also had a significant population of IL-2-producing cells and  
353 more double- and triple-producing cells, compared to TBLN, lung and PBMC. The CD4 T-cell  
354 response was also greatest in the BAL, although much lower and declining more rapidly than  
355 the CD8 response. The cytokine responses were similar between the in-contact and directly  
356 infected animals, indicating the similarities between experimental intra-nasal challenge and  
357 natural infection. No differences in magnitude, kinetic and quality of cytokine responses were  
358 observed between the OB and BM animals.

359  
360  **$\gamma\delta$  T cell responses during H1N1pdm09 infection in pigs.** The importance of  $\gamma\delta$  T cells in  
361 control of influenza infection has been demonstrated in mice and humans (Carding et al.,  
362 1990; Li et al., 2013a; Xue et al., 2017; Palomino-Segura et al., 2020). In pigs  $\gamma\delta$  T cells are a  
363 prominent population in blood and secondary lymphoid organs and can produce IFN $\gamma$ , TNF  
364 and IL-17A following polyclonal stimulation (Takamatsu et al., 2006; Gerner et al., 2009;  
365 Sedlak et al., 2014). Porcine  $\gamma\delta$  T cells have been divided into different subsets based on the  
366 expression of CD2 and CD8 $\alpha$  (Stepanova and Sinkora, 2013).

367 We measured IFN $\gamma$ , TNF and IL-17A production in CD2<sup>+</sup>  $\gamma\delta$  cells immediately *ex vivo*  
368 and following H1N1pdm09 re-stimulation. The cytokine production by CD2<sup>-</sup>  $\gamma\delta$  T cells was very  
369 low (data not shown) and thus we focused on CD2<sup>+</sup>  $\gamma\delta$  T cells. *Ex vivo*, BAL CD2<sup>+</sup>  $\gamma\delta$  cells,  
370 without H1N1pdm09 stimulation, secreted IFN $\gamma$  and TNF early post infection with the highest  
371 frequency of 0.6% IFN $\gamma$  and 1.6% TNF at 3 DPI. The cells co-produced IFN $\gamma$ /TNF at low levels  
372 **(Fig. 5)**. A minimal amount of IL-17A was detected in BAL and no IFN $\gamma$ , TNF or IL-17 in the  
373 other tissues *ex vivo* (data not shown).

374 We also measured cytokine production after H1N1pdm09 stimulation *in vitro* and the  
375 highest proportion of IFN $\gamma$  producing cells was detected in BAL and lung at 7 DPI and  
376 maintained until 13 DPI (0.4% at 11 DPI for BAL) while in lung the highest frequency was 0.4%  
377 at 7 DPI **(Fig. 6)**. TNF showed similar pattern in BAL: increased at 9 DPI reaching a peak at  
378 11 DPI with a mean of 0.7%. At later stages of infection, the frequency of cytokine producing  
379 cells were much lower. The majority of the H1N1pdm09 stimulated cells were IFN $\gamma$ /TNF co-  
380 producing **(Suppl Fig. 5)**. The responses in the contacts (0.5% for IFN $\gamma$  and more than 1 % for  
381 TNF) were similar to those in the directly challenged animals following H1N1pdm09 stimulation  
382 **(Table 2)**. The proportion of IL-17A secreting CD2<sup>+</sup> cells was much lower compared to IFN $\gamma$   
383 and TNF with the greatest response in the BAL at 11 DPI (0.2%).

384 Overall these data demonstrate that  $\gamma\delta$  cells produce cytokines *ex vivo* early post  
385 infection, but that H1N1pdm09 *in vitro* stimulation increases cytokine production in CD2<sup>+</sup>  $\gamma\delta$  T  
386 cells from 7 to 13 DPI. No difference between OB and BM pigs were detected of response of  
387 *ex vivo* or stimulated  $\gamma\delta$  cells.

388  
389 **Antibody and B cell responses during H1N1pdm09 infection in pigs.** The antibody  
390 response after H1N1pdm09 infection was determined in serum, BAL and nasal swabs. Virus  
391 specific IgG and IgA were measured by end point titer ELISA against H1N1pdm09 virus or  
392 recombinant HA from H1N1pdm09/A/England/195/2009 (pH1) **(Figs. 7A and B)**. Serum IgG  
393 against H1N1pdm09 virus was detectable at 5-6 DPI, reached its peak at 14 DPI (1:13,650)  
394 and was maintained until 21 DPI (1:8,530). IgA titers were lower compared to IgG. In contrast  
395 in BAL, IgG and IgA against H1N1pdm09 were present at the same levels. BAL IgG reached  
396 a peak of 1:2,370 at 13 DPI which was maintained up to 21 DPI. IgG and IgA were also  
397 measured in nasal swabs from experiment BM3 up to 9 DPI. Responses were detected at 6  
398 DPI reaching a peak of 1:48 and 1:28 respectively by 9 DPI. We measured the ELISA  
399 response to pH1, which had a similar kinetic as the response to H1N1pdm09 virus but with  
400 approximately a log lower titer **(Fig. 7B)**. No significant differences in the upper asymptote,  
401 rate of increase in titre or time of maximum increase were detected for IgG or IgA between

402 OB and BM, except for serum IgA H1N1 ELISA (upper asymptote OB 1:2,700 > BM 1:2,100,  
403 p=0.05).

404 To assess the breadth and cross-reactivity of the Ab, we tested the binding of sera  
405 from 21 DPI to MDCK cells expressing pH1, H5 (from A/Vietnam/1203/2004) and HA from  
406 PR8 in which, unlike in ELISA, the natural conformation of HA is maintained. There was strong  
407 binding to the MDCK expressing pH1 and weaker binding to H5 and HA from PR8 suggesting  
408 that H1N1pdm09 induces cross reactive responses to other group 1 H1 and H5 viruses (**Fig.**  
409 **7C**).

410 The function of antibodies in serum and BAL was tested by microneutralization (MN)  
411 assessing inhibition of virus entry, inhibition of hemagglutination (HAI) and inhibition of  
412 neuraminidase activity by enzyme-linked lectin assay (ELLA) (**Fig. 8A**). MN was first detected  
413 in serum at 5 or 6 DPI mirroring Ab production in the tissues, increasing to 1:140 at 11 DPI at  
414 and 1:480 at 21 DPI. HAI and ELLA followed a similar pattern reaching 1:746 HAI or 1:160  
415 ELLA at 21 DPI. BAL showed much lower MN, HAI and ELLA responses compared to serum.  
416 MN and ELLA titres in BAL peaked at 13 DPI and were maintained until 20 DPI. HAI reached  
417 a peak at 11 DPI and was undetectable at DPI 21. No significant differences in MN, HAI and  
418 ELLA in the upper asymptote, rate of increase in titre or time of maximum increase between  
419 OB and BM animals were detected

420 To determine the major sites of Ab production following H1N1pdm09 infection BAL,  
421 lung, TBLN, spleen and PBMC from experiment BM3 were tested for total IgG and HA-specific  
422 Ab secreting cells (ASC) (**Fig. 8B**). IgG producing cells were detected in all tissues with a  
423 trend for increasing numbers over time up to 21 DPI. TBLN showed the highest frequency of  
424 HA specific ASC reaching 200 ASC/10<sup>6</sup>cells at 20/21 DPI. Lung demonstrated a similar pattern  
425 but with 18 ASC/10<sup>6</sup>cells at 20/21 DPI.

426 In summary a strong Ab response was detected in serum, which was dominated by  
427 IgG, while in BAL the ELISA titers of IgG and IgA were comparable. Antibodies cross reacted  
428 with HA from H1 and H5 viruses. Microneutralization, HAI and ELLA titers were much higher  
429 in serum than BAL. HA specific ASC were detected in TBLN and lung. No differences were  
430 observed in the Ab responses between OB and BM animals.

431

## 432 **Discussion**

433 In this study we investigated the kinetic and magnitude of T cell and Ab responses in  
434 respiratory tissues and blood in outbred Landrace x Hampshire cross and inbred Babraham  
435 pigs following H1N1pdm09 infection. The relationship between these parameters and the virus  
436 load is illustrated in **Fig. 9**. After experimental infection with H1N1pdm09 virus shedding  
437 plateaued between 1 and 4 - 5 DPI, followed by a steep decline so that by 9 DPI no virus could

438 be detected in any animal. An *ex vivo*  $\gamma\delta$  cell IFN $\gamma$  and TNF response was apparent from 2  
439 DPI, although this declined by 7 DPI. In contrast, virus specific IFN $\gamma$  producing  $\gamma\delta$  cells were  
440 detected at 7 DPI and maintained to 13 DPI. Significant virus specific CD4 and CD8 T cell  
441 response were present at 6 DPI. Similarly, virus-specific IgG and IgA were detected in serum  
442 and BAL at 5 - 6 DPI by which time the viral load had declined by 2-3 logs. By the time of the  
443 peak of the T cell and Ab responses (9-14 DPI), no virus was detectable. These kinetics  
444 suggest that innate mechanisms, including perhaps early  $\gamma\delta$  cell cytokine secretion, contain  
445 viral replication at a plateau level in the first 4-5 days post infection, while adaptive T and Ab  
446 responses contribute to the complete clearance of virus after 5 DPI in primary infection and  
447 prevent future infections by a more rapid secondary immune response.

448 Similar kinetics of adaptive T cell responses have been reported in mice, with antigen  
449 specific cells detected as early 4-5 days post infection, increasing in number between 5 -12  
450 DPI in lung tissues (Lawrence et al., 2005; Miao et al., 2010). Experiments in mice have shown  
451 that depletion of B or CD8 T cells results in delayed clearance of IAV (Eichelberger et al.,  
452 1991; Bender et al., 1992; Sarawar et al., 1994; Graham and Braciale, 1997). CD4 T cells also  
453 contribute to control of influenza infection, although depletion of this cell subset alone only  
454 slightly delayed viral clearance (Topham et al., 1996; Román et al., 2002; Jelley-Gibbs et al.,  
455 2005). The strong CD8 and Ab responses detected in the present study suggests that these  
456 cell types are also important for viral clearance in pigs. This could be confirmed by depletions  
457 studies or cell transfer in inbred Babraham pigs.

458 Few studies have analysed in depth the conventional T cell response in pigs. The most  
459 comprehensive study showed a low frequency of virus specific IFN $\gamma$  producing CD4 and CD8  
460 in the lung as early as 4 DPI after H1N2 intratracheal challenge, reaching a peak at 9 DPI,  
461 with the highest response in lung compared to TBLN or PBMC (Talker et al., 2016). Here, for  
462 the first time, we have analysed the cytokine responses in BAL as well as lung interstitial  
463 tissues, which showed a similar kinetic. However, the response in the BAL was much stronger  
464 in terms of frequency of cytokine producing T cells. The BAL T cells produced multiple  
465 cytokines and more per cell, indicating that they may be most efficient in clearing the virus.  
466 Cytokine production differed between CD8 and CD4 cells and between BAL, lung and TBLN,  
467 perhaps reflecting the extensive tissue compartmentalization in the respiratory tract and  
468 differential localization of CD4 and CD8 T cells (Topham and Reilly, 2018). Whether  
469 specialized CD4 and CD8 cells are compartmentalized due to the migration of different  
470 subsets to specific sites, as has been proposed in mice, or because tissue environments alter  
471 cytokine production remains to be established (Strutt et al., 2013).

472 An important difference between the present study and Talker *et al* is that they used  
473 the more pathogenic swine H1N2 virus, which was delivered in a large volume and high dose

474 (15 ml of  $10^7$  TCID<sub>50</sub>/ml) intratracheally (Talker et al., 2016). This might explain the stronger  
475 and more prolonged lung, TBLN and PBMC responses they observed. The pigs in the present  
476 study were infected intranasally with a MAD and the response here was similar to the in-  
477 contact animals, suggesting that this method is more similar to natural infection. Furthermore  
478 our scintigraphy study also indicates that this method of challenge targets both the upper and  
479 lower respiratory tract (Martini, 2020).

480 We detected a 27 times lower proportion of CD8 antigen-specific cells in the blood  
481 compared to BAL. Similarly, antigen-specific CD8 cells responses were much higher in the  
482 BAL of patients with H1N1pdm09 compared to blood (Zhao et al., 2012). This indicates that  
483 sampling blood is not reflective of the true response in the lung and local tissues, which has  
484 implications for the design and analysis of clinical trials for T-cell targeted vaccines. In contrast,  
485 CD4 responses were more similar in magnitude in blood and BAL, although less long lived  
486 than CD8.

487 The contributions of  $\gamma\delta$  cells to lung homeostasis and influenza immunity remain  
488 incompletely explored. In pigs,  $\gamma\delta$  cells comprise up to 50% of lymphocytes in the blood  
489 (particularly in young animals) in contrast to humans where they usually represent 1-5% of  
490 lymphocytes (Roden et al., 2008; Schwaiger et al., 2019).  $\gamma\delta$  T cell have previously been  
491 reported to increase late after IAV infection in mice, although an early increase in  $\gamma\delta$  cells in  
492 mice and pigs has also been reported (Carding et al., 1990; Khatri et al., 2010; Palomino-  
493 Segura et al., 2020). Human  $\gamma\delta$  cells can expand in a TCR-independent manner in response  
494 to IAV, and the human V $\gamma$ 9V $\delta$ 2 T cell subset kills IAV-infected A549 airway cells (Li et al.,  
495 2013b). Although we did not observe a significant increase in  $\gamma\delta$  cells after H1N1pdm09  
496 infection, we showed that  $\gamma\delta$  cells produce IFN $\gamma$  and TNF as early as day 2 post infection *ex*  
497 *vivo*, in agreement with studies in mice (Xue et al., 2017).  $\gamma\delta$  cells are a major source for IL-  
498 17 production, which has been shown to play a role in IAV infection, but we detected only low  
499 levels of IL-17A after H1N1pdm09 stimulation of BAL cells (Crowe et al., 2009; Li et al., 2012;  
500 Palomino-Segura et al., 2020). Surprisingly, we demonstrated that *in vitro* stimulation with  
501 H1N1pdm09 induces IFN $\gamma$  and TNF production in CD2<sup>+</sup>  $\gamma\delta$  T cells from 7 to 13 DPI. This is  
502 reminiscent of an adaptive T cell response. Recombinant hemagglutinin from H5N1 has been  
503 previously demonstrated to activate human PBMC  $\gamma\delta$  T cells *in vitro* and this was not mediated  
504 by TCR or pattern recognition receptors (Lu et al., 2013). Further studies will elucidate the  
505 mechanisms of cytokine induction and whether it is TCR dependent.

506 H1N1pdm09 infection was characterised by high IgG and IgA titers in serum and BAL,  
507 and a detectable antibody titer in nasal swabs. The IgG titer was higher than IgA in serum,  
508 while similar levels of IgA and IgG were detected in BAL and nasal swabs, suggesting local  
509 production of this isotype or more efficient translocation. Neutralization, HAI and

510 neuraminidase inhibition titers peaked at 11 - 21 DPI. Our findings are in agreement with  
511 previous studies showing that in experimentally H1N1 infected pigs HA-specific antibodies  
512 peaked at 2-3 weeks (Larsen et al., 2000). Similarly we detected HA-specific antibody-  
513 secreting cells in the local TBLN and lung tissues, but not PBMC (Larsen et al., 2000).  
514 However, it might be that antibody-secreting cells are largely lost in these liquid nitrogen frozen  
515 and thawed samples.

516 Despite centuries of agricultural selective breeding, the pig has maintained a  
517 significant level of SLA genetic diversity, with 227 class I and 211 class II alleles identified for  
518 *Sus scrofa* in the Immuno-Polymorphism Database (IPD) MHC database to date, making  
519 analysis of the fine specificity of immune responses extremely difficult (Maccari et al., 2017).  
520 The inbred Babraham line of pigs, on the other hand, is SLA homozygous for class I SLA-  
521 1\*14:02; SLA-2\*11:04 and SLA-3\*04:03 and class II DRB1-\*05:01, DQA-\*01:03 and DQB1-  
522 \*08:01 (Schwartz et al., 2018). This homozygosity enabled the use of peptide-SLA tetramers  
523 to the dominant NP antigen to track the CD8 response in tissues in this study (Tungatt et al.,  
524 2018). The  $\alpha\beta$ ,  $\gamma\delta$  T-cell and Ab responses in the OB and BM animals were comparable,  
525 although there was lower proportion of CD8 cells and higher proportion of  $\gamma\delta$  cells in the BM  
526 pigs. This may be due to a genetic difference, although it may also be a result of different  
527 housing conditions, since the Babraham pigs are maintained under specific pathogen free  
528 conditions, whereas the outbred pigs were obtained from a commercial breeder.

529 Our detailed analysis of immune responses in pigs showed that the viral load is  
530 contained in the period before the adaptive response is detectable, indicating the importance  
531 of innate immune mechanisms in influenza infection. As in other species however it appears  
532 that the adaptive response is essential for elimination of virus. BAL contains the most highly  
533 activated CD8, CD4 and  $\gamma\delta$  cells producing large amounts of cytokines, which likely contribute  
534 to clearance of virus. We further show clear differences between the function of CD4, CD8  
535 and  $\gamma\delta$  T cells between the lung, BAL and TBLN, while the blood is a poor representation of  
536 the local immune response. The immune response in the Babraham pig following H1N1pdm09  
537 influenza infection was comparable to that of outbred animals. The availability of fine grain  
538 immunologic tools in Babraham pigs will allow the unraveling of immune mechanisms and  
539 confirm and extend findings in outbred populations.

540

541 **Funding:** This work was funded by the UKRI Biotechnology and Biological Sciences Research  
542 Council (BBSRC) grants: sLoLa BB/L001330/1, BBS/E/I/00007031, BBS/E/I/00007038 and  
543 BBS/E/I/00007039.

544



545 **Acknowledgements.** We are grateful to animal staff at Langford School of Veterinary for  
546 providing excellent animal care. We are grateful to Alain Townsend for providing recombinant  
547 HAs and H7N1 virus. We thank APHA for providing the swine A/Sw/Eng/1353/09 influenza  
548 virus strain (DEFRA surveillance programme SW3401).

549

550 **Authors contribution.** BC, MB, ET conceived, designed and coordinated the study. BC,  
551 MB, ET, ME, AM, EP, EV, BP, VM OF, RH, AT, RB, SM designed and performed experiments,  
552 processed samples and analyzed the data. SG performed statistical analysis. AF and AS  
553 generated SLA tetramers. ET, ME, EV, AM wrote and revised the manuscript and figures. All  
554 authors reviewed the manuscript.

## 555 References

- 556 Bates, D., Mächler, M., Bolker, B., and Walker, S. (2015). Fitting Linear Mixed-Effects Models Using  
557 lme4. *Journal of Statistical Software* 67(1), 1-48.
- 558 Bender, B.S., Croghan, T., Zhang, L., and Small, P.A., Jr. (1992). Transgenic mice lacking class I major  
559 histocompatibility complex-restricted T cells have delayed viral clearance and increased  
560 mortality after influenza virus challenge. *J Exp Med* 175(4), 1143-1145. doi:  
561 10.1084/jem.175.4.1143.
- 562 Binns, R.M., Blakeley, D., and Licence, S.T. (1981). Migration of fluoresceinated pig lymphocytes in  
563 vivo: technical aspects and use in studies of autologous and homologous cell survival for up  
564 to three weeks. *Int Arch Allergy Appl Immunol* 66(3), 341-349. doi: 10.1159/000232839.
- 565 Bouvier, N.M., and Lowen, A.C. (2010). Animal Models for Influenza Virus Pathogenesis and  
566 Transmission. *Viruses* 2(8), 1530-1563. doi: 10.3390/v20801530.
- 567 Canini, L., Holzer, B., Morgan, S., Dinie Hemmink, J., Clark, B., Woolhouse, M.E.J., et al. (2020).  
568 Timelines of infection and transmission dynamics of H1N1pdm09 in swine. *PLoS Pathog*  
569 16(7), e1008628. doi: 10.1371/journal.ppat.1008628.
- 570 Carding, S.R., Allan, W., Kyes, S., Hayday, A., Bottomly, K., and Doherty, P.C. (1990). Late dominance  
571 of the inflammatory process in murine influenza by gamma/delta + T cells. *J Exp Med* 172(4),  
572 1225-1231. doi: 10.1084/jem.172.4.1225.
- 573 Choi, N.R., Seo, D.W., Choi, K.M., Ko, N.Y., Kim, J.H., Kim, H.I., et al. (2016). Analysis of Swine  
574 Leukocyte Antigen Haplotypes in Yucatan Miniature Pigs Used as Biomedical Model Animal.  
575 *Asian-Australas J Anim Sci* 29(3), 321-326. doi: 10.5713/ajas.15.0331.
- 576 Crowe, C.R., Chen, K., Pociask, D.A., Alcorn, J.F., Krivich, C., Enelow, R.I., et al. (2009). Critical role of  
577 IL-17RA in immunopathology of influenza infection. *J Immunol* 183(8), 5301-5310. doi:  
578 10.4049/jimmunol.0900995.
- 579 Eichelberger, M., Allan, W., Zijlstra, M., Jaenisch, R., and Doherty, P.C. (1991). Clearance of influenza  
580 virus respiratory infection in mice lacking class I major histocompatibility complex-restricted  
581 CD8+ T cells. *J Exp Med* 174(4), 875-880. doi: 10.1084/jem.174.4.875.
- 582 Gerner, W., Käser, T., and Saalmüller, A. (2009). Porcine T lymphocytes and NK cells--an update. *Dev*  
583 *Comp Immunol* 33(3), 310-320. doi: 10.1016/j.dci.2008.06.003.
- 584 Graham, M.B., and Braciale, T.J. (1997). Resistance to and recovery from lethal influenza virus  
585 infection in B lymphocyte-deficient mice. *J Exp Med* 186(12), 2063-2068. doi:  
586 10.1084/jem.186.12.2063.
- 587 Hayward, A.C., Wang, L., Goonetilleke, N., Fragaszy, E.B., Bermingham, A., Copas, A., et al. (2015).  
588 Natural T Cell-mediated Protection against Seasonal and Pandemic Influenza. Results of the  
589 Flu Watch Cohort Study. *Am J Respir Crit Care Med* 191(12), 1422-1431. doi:  
590 10.1164/rccm.201411-1988OC.
- 591 Heinen, P.P., van Nieuwstadt, A.P., Pol, J.M., de Boer-Luijtz, E.A., van Oirschot, J.T., and Bianchi, A.T.  
592 (2000). Systemic and mucosal isotype-specific antibody responses in pigs to experimental  
593 influenza virus infection. *Viral Immunol* 13(2), 237-247. doi: 10.1089/vim.2000.13.237.
- 594 Hemmink, J.D., Whittaker, C.J., and Shelton, H.A. (2018). Animal Models in Influenza Research.  
595 *Methods Mol Biol* 1836, 401-430. doi: 10.1007/978-1-4939-8678-1\_20.
- 596 Holzer, B., Martini, V., Edmans, M., and Tchilian, E. (2019). T and B Cell Immune Responses to  
597 Influenza Viruses in Pigs. *Front Immunol* 10, 98. doi: 10.3389/fimmu.2019.00098.
- 598 Holzer, B., Morgan, S.B., Matsuoka, Y., Edmans, M., Salguero, F.J., Everett, H., et al. (2018a).  
599 Comparison of Heterosubtypic Protection in Ferrets and Pigs Induced by a Single-Cycle  
600 Influenza Vaccine. *J Immunol* 200(12), 4068-4077. doi: 10.4049/jimmunol.1800142.
- 601 Holzer, B., Morgan, S.B., Matsuoka, Y., Edmans, M., Salguero, F.J., Everett, H., et al. (2018b).  
602 Comparison of Heterosubtypic Protection in Ferrets and Pigs Induced by a Single-Cycle  
603 Influenza Vaccine. *The Journal of Immunology* 200(12), 4068. doi:  
604 10.4049/jimmunol.1800142.

- 605 Huang, K.Y., Rijal, P., Schimanski, L., Powell, T.J., Lin, T.Y., McCauley, J.W., et al. (2015). Focused  
606 antibody response to influenza linked to antigenic drift. *J Clin Invest* 125(7), 2631-2645. doi:  
607 10.1172/jci81104.
- 608 Janke, B.H. (2014). Influenza A virus infections in swine: pathogenesis and diagnosis. *Vet Pathol*  
609 51(2), 410-426. doi: 10.1177/0300985813513043.
- 610 Jelley-Gibbs, D.M., Dibble, J.P., Filipson, S., Haynes, L., Kemp, R.A., and Swain, S.L. (2005). Repeated  
611 stimulation of CD4 effector T cells can limit their protective function. *J Exp Med* 201(7),  
612 1101-1112. doi: 10.1084/jem.20041852.
- 613 Kaplan, B.S., Kimble, J.B., Chang, J., Anderson, T.K., Gauger, P.C., Janas-Martindale, A., et al. (2020).  
614 Aerosol transmission from infected swine to ferrets of an H3N2 virus collected from an  
615 agricultural fair and associated with human variant infections. *Journal of Virology*, JVI.01009-  
616 01020. doi: 10.1128/jvi.01009-20.
- 617 Khatri, M., Dwivedi, V., Krakowka, S., Manickam, C., Ali, A., Wang, L., et al. (2010). Swine influenza  
618 H1N1 virus induces acute inflammatory immune responses in pig lungs: a potential animal  
619 model for human H1N1 influenza virus. *J Virol* 84(21), 11210-11218. doi: 10.1128/JVI.01211-  
620 10.
- 621 Larsen, D.L., Karasin, A., Zuckermann, F., and Olsen, C.W. (2000). Systemic and mucosal immune  
622 responses to H1N1 influenza virus infection in pigs. *Vet Microbiol* 74(1-2), 117-131. doi:  
623 10.1016/S0378-1135(00)00172-3.
- 624 Lawrence, C.W., Ream, R.M., and Braciale, T.J. (2005). Frequency, specificity, and sites of expansion  
625 of CD8+ T cells during primary pulmonary influenza virus infection. *J Immunol* 174(9), 5332-  
626 5340. doi: 10.4049/jimmunol.174.9.5332.
- 627 Lewis, N.S., Russell, C.A., Langat, P., Anderson, T.K., Berger, K., Bielejec, F., et al. (2016). The global  
628 antigenic diversity of swine influenza A viruses. *Elife* 5, e12217. doi: 10.7554/eLife.12217.
- 629 Li, C., Yang, P., Sun, Y., Li, T., Wang, C., Wang, Z., et al. (2012). IL-17 response mediates acute lung  
630 injury induced by the 2009 pandemic influenza A (H1N1) virus. *Cell Res* 22(3), 528-538. doi:  
631 10.1038/cr.2011.165.
- 632 Li, H., Xiang, Z., Feng, T., Li, J., Liu, Y., Fan, Y., et al. (2013a). Human Vgamma9Vdelta2-T cells  
633 efficiently kill influenza virus-infected lung alveolar epithelial cells. *Cell Mol Immunol* 10(2),  
634 159-164. doi: 10.1038/cmi.2012.70.
- 635 Li, H., Xiang, Z., Feng, T., Li, J., Liu, Y., Fan, Y., et al. (2013b). Human Vgamma9Vdelta2-T cells efficiently kill  
636 influenza virus-infected lung alveolar epithelial cells. *Cell Mol Immunol* 10(2), 159-164. doi:  
637 10.1038/cmi.2012.70.
- 638 Lu, Y., Li, Z., Ma, C., Wang, H., Zheng, J., Cui, L., et al. (2013). The interaction of influenza H5N1 viral  
639 hemagglutinin with sialic acid receptors leads to the activation of human gamma delta T cells. *Cell Mol*  
640 *Immunol* 10(6), 463-470. doi: 10.1038/cmi.2013.26.
- 641 Maccari, G., Robinson, J., Ballingall, K., Guethlein, L.A., Grimholt, U., Kaufman, J., et al. (2017). IPD-  
642 MHC 2.0: an improved inter-species database for the study of the major histocompatibility  
643 complex. *Nucleic Acids Res* 45(D1), D860-d864. doi: 10.1093/nar/gkw1050.
- 644 Margine, I., and Krammer, F. (2014). Animal models for influenza viruses: implications for universal  
645 vaccine development. *Pathogens* 3(4), 845-874. doi: 10.3390/pathogens3040845.
- 646 Martini, V.H., M.; Blackshaw E.; Joyce, M.; McNee, A.; Beverley, P.; Townsend, A.; MacLoughlin, R.;  
647 Tchilian, E. (2020). Distribution of droplets and immune responses after aerosol and intra-  
648 nasal delivery of influenza virus to the respiratory tract of pigs. *bioRxiv*  
649 <https://doi.org/10.1101/2020.06.04.134098>. doi:  
650 <https://doi.org/10.1101/2020.06.04.134098>.
- 651 McMichael, A.J., Gotch, F.M., Noble, G.R., and Beare, P.A. (1983). Cytotoxic T-cell immunity to  
652 influenza. *N Engl J Med* 309(1), 13-17. doi: 10.1056/NEJM198307073090103.
- 653 McNee, A., Smith, T.R.F., Holzer, B., Clark, B., Bessell, E., Guibinga, G., et al. (2020). Establishment of  
654 a Pig Influenza Challenge Model for Evaluation of Monoclonal Antibody Delivery Platforms. *J*  
655 *Immunol*. doi: 10.4049/jimmunol.2000429.

- 656 Miao, H., Hollenbaugh, J.A., Zand, M.S., Holden-Wiltse, J., Mosmann, T.R., Perelson, A.S., et al.  
657 (2010). Quantifying the early immune response and adaptive immune response kinetics in  
658 mice infected with influenza A virus. *J Virol* 84(13), 6687-6698. doi: 10.1128/jvi.00266-10.
- 659 Mifsud, E.J., Tai, C.M., and Hurt, A.C. (2018). Animal models used to assess influenza antivirals.  
660 *Expert Opin Drug Discov* 13(12), 1131-1139. doi: 10.1080/17460441.2018.1540586.
- 661 Morgan, S.B., Hemmink, J.D., Porter, E., Harley, R., Shelton, H., Aramouni, M., et al. (2016a). Aerosol  
662 Delivery of a Candidate Universal Influenza Vaccine Reduces Viral Load in Pigs Challenged  
663 with Pandemic H1N1 Virus. *J Immunol* 196(12), 5014-5023. doi: 10.4049/jimmunol.1502632.
- 664 Morgan, S.B., Hemmink, J.D., Porter, E., Harley, R., Shelton, H., Aramouni, M., et al. (2016b). Aerosol  
665 Delivery of a Candidate Universal Influenza Vaccine Reduces Viral Load in Pigs Challenged  
666 with Pandemic H1N1 Virus. *Journal of Immunology* 196(12), 5014-5023. doi:  
667 10.4049/jimmunol.1502632.
- 668 Nelson, M.I., and Vincent, A.L. (2015). Reverse zoonosis of influenza to swine: new perspectives on  
669 the human-animal interface. *Trends Microbiol* 23(3), 142-153. doi:  
670 10.1016/j.tim.2014.12.002.
- 671 Palomino-Segura, M., Latino, I., Farsakoglu, Y., and Gonzalez, S.F. (2020). Early production of IL-17A  
672 by  $\gamma\delta$  T cells in the trachea promotes viral clearance during influenza infection in mice. *Eur J*  
673 *Immunol* 50(1), 97-109. doi: 10.1002/eji.201948157.
- 674 Powell, T.J., Silk, J.D., Sharps, J., Fodor, E., and Townsend, A.R. (2012). Pseudotyped influenza A virus  
675 as a vaccine for the induction of heterotypic immunity. *J Virol* 86(24), 13397-13406. doi:  
676 10.1128/JVI.01820-12.
- 677 Rajao, D.S., and Vincent, A.L. (2015). Swine as a model for influenza A virus infection and immunity.  
678 *ILAR J* 56(1), 44-52. doi: 10.1093/ilar/ilv002.
- 679 Roden, A.C., Morice, W.G., and Hanson, C.A. (2008). Immunophenotypic attributes of benign  
680 peripheral blood gammadelta T cells and conditions associated with their increase. *Arch*  
681 *Pathol Lab Med* 132(11), 1774-1780. doi: 10.1043/1543-2165-132.11.1774.
- 682 Román, E., Miller, E., Harmsen, A., Wiley, J., Von Andrian, U.H., Huston, G., et al. (2002). CD4 effector  
683 T cell subsets in the response to influenza: heterogeneity, migration, and function. *J Exp Med*  
684 196(7), 957-968. doi: 10.1084/jem.20021052.
- 685 Sachs, D.H., Leight, G., Cone, J., Schwarz, S., Stuart, L., and Rosenberg, S. (1976). Transplantation in  
686 miniature swine. I. Fixation of the major histocompatibility complex. *Transplantation* 22(6),  
687 559-567. doi: 10.1097/00007890-197612000-00004.
- 688 Sarawar, S.R., Sangster, M., Coffman, R.L., and Doherty, P.C. (1994). Administration of anti-IFN-  
689 gamma antibody to beta 2-microglobulin-deficient mice delays influenza virus clearance but  
690 does not switch the response to a T helper cell 2 phenotype. *J Immunol* 153(3), 1246-1253.
- 691 Schwaiger, T., Sehl, J., Karte, C., Schäfer, A., Hühr, J., Mettenleiter, T.C., et al. (2019). Experimental  
692 H1N1pdm09 infection in pigs mimics human seasonal influenza infections. *PLoS One* 14(9),  
693 e0222943. doi: 10.1371/journal.pone.0222943.
- 694 Schwartz, J.C., Hemmink, J.D., Graham, S.P., Tchilian, E., Charleston, B., Hammer, S.E., et al. (2018).  
695 The major histocompatibility complex homozygous inbred Babraham pig as a resource for  
696 veterinary and translational medicine. *HLA*. doi: 10.1111/tan.13281.
- 697 Sedlak, C., Patzl, M., Saalmüller, A., and Gerner, W. (2014). CD2 and CD8 $\alpha$  define porcine  $\gamma\delta$  T cells  
698 with distinct cytokine production profiles. *Dev Comp Immunol* 45(1), 97-106. doi:  
699 10.1016/j.dci.2014.02.008.
- 700 Signer, E.N., Jeffreys, A.J., Licence, S., Miller, R., Byrd, P., and Binns, R. (1999). DNA profiling reveals  
701 remarkably low genetic variability in a herd of SLA homozygous pigs. *Res Vet Sci* 67(2), 207-  
702 211. doi: 10.1053/rvsc.1999.0310.
- 703 Smith, G.J., Vijaykrishna, D., Bahl, J., Lycett, S.J., Worobey, M., Pybus, O.G., et al. (2009). Origins and  
704 evolutionary genomics of the 2009 swine-origin H1N1 influenza A epidemic. *Nature*  
705 459(7250), 1122-1125. doi: 10.1038/nature08182.

- 706 Sridhar, S., Begom, S., Bermingham, A., Hoschler, K., Adamson, W., Carman, W., et al. (2013). Cellular  
707 immune correlates of protection against symptomatic pandemic influenza. *Nat Med* 19(10),  
708 1305-1312. doi: 10.1038/nm.3350.
- 709 Stepanova, K., and Sinkora, M. (2013). Porcine  $\gamma\delta$  T lymphocytes can be categorized into two  
710 functionally and developmentally distinct subsets according to expression of CD2 and level  
711 of TCR. *J Immunol* 190(5), 2111-2120. doi: 10.4049/jimmunol.1202890.
- 712 Strutt, T.M., McKinstry, K.K., Marshall, N.B., Vong, A.M., Dutton, R.W., and Swain, S.L. (2013).  
713 Multipronged CD4(+) T-cell effector and memory responses cooperate to provide potent  
714 immunity against respiratory virus. *Immunological reviews* 255(1), 149-164. doi:  
715 10.1111/imr.12088.
- 716 Sun, H., Xiao, Y., Liu, J., Wang, D., Li, F., Wang, C., et al. (2020). Prevalent Eurasian avian-like H1N1  
717 swine influenza virus with 2009 pandemic viral genes facilitating human infection. *Proc Natl*  
718 *Acad Sci U S A*. doi: 10.1073/pnas.1921186117.
- 719 Takamatsu, H.H., Denyer, M.S., Stirling, C., Cox, S., Aggarwal, N., Dash, P., et al. (2006). Porcine  
720 gammadelta T cells: possible roles on the innate and adaptive immune responses following  
721 virus infection. *Vet Immunol Immunopathol* 112(1-2), 49-61. doi:  
722 10.1016/j.vetimm.2006.03.011.
- 723 Talker, S.C., Koinig, H.C., Stadler, M., Graage, R., Klingler, E., Ladinig, A., et al. (2015). Magnitude and  
724 kinetics of multifunctional CD4+ and CD8beta+ T cells in pigs infected with swine influenza A  
725 virus. *Vet Res* 46(1), 52. doi: 10.1186/s13567-015-0182-3.
- 726 Talker, S.C., Stadler, M., Koinig, H.C., Mair, K.H., Rodriguez-Gomez, I.M., Graage, R., et al. (2016).  
727 Influenza A Virus Infection in Pigs Attracts Multifunctional and Cross-Reactive T Cells to the  
728 Lung. *J Virol* 90(20), 9364-9382. doi: 10.1128/JVI.01211-16.
- 729 Topham, D.J., and Reilly, E.C. (2018). Tissue-Resident Memory CD8+ T Cells: From Phenotype to  
730 Function. *Frontiers in Immunology* 9, 515.
- 731 Topham, D.J., Tripp, R.A., Sarawar, S.R., Sangster, M.Y., and Doherty, P.C. (1996). Immune CD4+ T  
732 cells promote the clearance of influenza virus from major histocompatibility complex class II  
733  $-/-$  respiratory epithelium. *J Virol* 70(2), 1288-1291. doi: 10.1128/jvi.70.2.1288-1291.1996.
- 734 Tungatt, K., Dolton, G., Morgan, S.B., Attaf, M., Fuller, A., Whalley, T., et al. (2018). Induction of  
735 influenza-specific local CD8 T-cells in the respiratory tract after aerosol delivery of vaccine  
736 antigen or virus in the Babraham inbred pig. *PLoS Pathog* 14(5), e1007017. doi:  
737 10.1371/journal.ppat.1007017.
- 738 Watson, S.J., Langat, P., Reid, S.M., Lam, T.T., Cotten, M., Kelly, M., et al. (2015). Molecular  
739 Epidemiology and Evolution of Influenza Viruses Circulating within European Swine between  
740 2009 and 2013. *J Virol* 89(19), 9920-9931. doi: 10.1128/JVI.00840-15.
- 741 Xue, C., Wen, M., Bao, L., Li, H., Li, F., Liu, M., et al. (2017). V $\gamma$ 4(+)  $\gamma\delta$ T Cells Aggravate Severe H1N1  
742 Influenza Virus Infection-Induced Acute Pulmonary Immunopathological Injury via Secreting  
743 Interleukin-17A. *Front Immunol* 8, 1054. doi: 10.3389/fimmu.2017.01054.
- 744 Zhao, Y., Zhang, Y.H., Denney, L., Young, D., Powell, T.J., Peng, Y.C., et al. (2012). High levels of virus-  
745 specific CD4+ T cells predict severe pandemic influenza A virus infection. *Am J Respir Crit*  
746 *Care Med* 186(12), 1292-1297. doi: 10.1164/rccm.201207-1245OC.

747

748

749 **Table 1.** Comparison of different populations of T cells from Babraham pigs infected with  
750 H1N1pdm09 virus.

| % T cells binding to tetramer or /cytokine producing |                       | Days Post Infection (DPI)                                                          |                                                                                    |                                                                                                         |
|------------------------------------------------------|-----------------------|------------------------------------------------------------------------------------|------------------------------------------------------------------------------------|---------------------------------------------------------------------------------------------------------|
|                                                      |                       | 6 DPI                                                                              | 7DPI                                                                               | 13 DPI                                                                                                  |
| <b>CD8β</b>                                          | NP <sub>290-298</sub> | no significant (P>0.05) differences*                                               | BAL†>PBMC (P=0.01)<br>lung>PBMC (P=0.04)<br>lung>TBLN (P=0.04)                     | BAL>lung (P=0.04)<br>BAL>TBLN (P=0.01)<br>BAL>PMBC (P=0.01)<br>lung>PMBC (P=0.01)<br>TBLN>PMBC (P=0.01) |
| <b>CD8β</b>                                          | IFN <sub>γ</sub>      | BAL>PBMC (P=0.01)<br>BAL>TBLN (P=0.01)<br>lung>PBMC (P=0.01)<br>lung>TBLN (P=0.03) | BAL>PBMC (P=0.01)<br>BAL>TBLN (P=0.01)<br>lung>PBMC (P=0.01)<br>lung>TBLN (P=0.03) | BAL>PBMC (P=0.01)<br>BAL>TBLN (P=0.01)<br>lung>PBMC (P=0.01)<br>lung>TBLN (P=0.03)                      |
|                                                      | IL-2                  | no significant (P>0.05) differences                                                | BAL> lung (P=0.06)<br>BAL>PBMC (P=0.02)<br>BAL>BM TBLN (P=0.02)                    | BAL>lung (P=0.01)<br>BAL>PBMC (P=0.01)<br>BAL>TBLN (P=0.01)                                             |
|                                                      | TNF                   | BAL>lung (P=0.01)<br>BAL>PBMC (P=0.01)<br>BAL>TBLN (P=0.01)<br>lung>PBMC (P=0.02)  | BAL>lung (P=0.02)<br>BAL>PBMC (P=0.01)<br>BAL>TBLN (P=0.01)<br>lung>PBMC (P=0.02)  | BAL>lung (P=0.01)<br>BAL>PBMC (P=0.01)<br>BAL>TBLN (P=0.01)<br>lung>PBMC (P=0.02)<br>lung>TBLN (P=0.06) |
| <b>CD4</b>                                           | IFN <sub>γ</sub>      | no significant (P>0.05) differences                                                | lung>TBLN (P=0.02)<br>lung>PBMC (P=0.01)                                           | BAL>PBMC (P=0.06)<br>lung>PBMC (P=0.06)                                                                 |
|                                                      | IL-2                  | BAL>PBMC (P=0.01)<br>lung>PBMC (P=0.03)<br>TBLN>PBMC (P=0.01)                      | BAL>PBMC (P=0.01)<br>lung>PBMC (P=0.01)<br>TBLN>PBMC (P=0.01)                      | BAL>PBMC (P=0.01)<br>lung>PBMC (P=0.01)<br>TBLN>PBMC (P=0.01)                                           |
|                                                      | TNF                   | no significant (P>0.05) differences                                                | no significant (P>0.05) differences                                                | BAL>PBMC (P=0.06)<br>TBLN> lung (P=0.06)<br>TBLN>PBMC (P=0.02)                                          |

751 \* P-values based on pairwise Mann-Whitney-Wilcoxon tests following a significant (P<0.05) Kruskal-  
752 Wallis test

753 † BAL: broncho-alveolar lavage; PBMC: peripheral blood mononuclear cell; TBLN: tracheobronchial  
754 lymph node

755

756

757 **Table 2.** Comparison of T cells in broncho-alveolar lavage from experimentally-inoculated (I)  
 758 and in-contact (C) Babraham (BM) and outbred (OB) pigs infected with H1N1pdm09 swine  
 759 influenza virus.

| T cells                                | % cells producing                       |                                                    |                                         |
|----------------------------------------|-----------------------------------------|----------------------------------------------------|-----------------------------------------|
|                                        | IFN $\gamma$                            | TNF                                                | IL-2 or IL-17a*                         |
| CD8 $\beta$                            | no significant<br>(P>0.05) differences† | no significant<br>(P>0.05) differences†            | no significant<br>(P>0.05) differences† |
| CD4                                    | no significant<br>(P>0.05) differences† | OB, C>BM, C<br>(P=0.03)<br>OB, C>BM, I<br>(P=0.02) | no significant<br>(P>0.05) differences† |
| $\gamma\delta$ <i>ex vivo</i>          | no significant<br>(P>0.05) differences† | no significant<br>(P>0.05) differences†            | not tested                              |
| $\gamma\delta$ H1N1pdm09<br>stimulated | no significant<br>(P>0.05) differences† | no significant<br>(P>0.05) differences†            | no significant<br>(P>0.05) differences† |

760 \* IL-2 for CD8 $\beta$  and CD4 T cells; IL-17a for  $\gamma\delta$  T cells

761 † P-values based on pairwise Mann-Whitney-Wilcoxon tests following a significant (P<0.05)  
 762 Kruskal-Wallis test

763

764 **Table 3.** Antibodies used

| Antigen                                               | Clone            | Isotype | Fluorochrome | Source of primary Ab    | Details of secondary Ab                |
|-------------------------------------------------------|------------------|---------|--------------|-------------------------|----------------------------------------|
| <b>Staining for conventional T cells</b>              |                  |         |              |                         |                                        |
| CD4                                                   | 74-12-4          | IgG2b   | PerCP-Cy5.5  | BD Biosciences          |                                        |
| CD8b                                                  | PPT23            | IgG1    | FITC         | Bio-Rad<br>Laboratories |                                        |
| TNF                                                   | MAb11            | IgG1    | BV421        | BioLegend               |                                        |
| IFN $\gamma$                                          | P2G10            | IgG1    | APC          | BD Biosciences          |                                        |
| IL-2                                                  | A150D 3F1<br>2H2 | IgG2a   | PE-Cy7       | ThermoFisher            | rat-anti-mouse,<br>IgG2a,<br>BioLegend |
| <b>Staining for <math>\gamma\delta</math> T cells</b> |                  |         |              |                         |                                        |
| TCR $\gamma\delta$                                    | PGBL22A          | IgG1    | PE-Cy7       | Cambridge<br>bioscience | rat-anti-mouse,<br>IgG1,<br>BioLegend  |
| CD8 $\alpha$                                          | 76-2-11          | IgG2a   | FITC         | BD Biosciences          |                                        |
| CD2                                                   | MSA4             | IgG2a   | PerCP-Cy5.5  | Cambridge<br>bioscience | rat-anti-mouse,<br>IgG2a,<br>BioLegend |
| TNF                                                   | MAb11            | IgG1    | BV421        | BioLegend               |                                        |
| IFN $\gamma$                                          | P2G10            | IgG1    | APC          | BD Biosciences          |                                        |
| IL-17A                                                | SCPL1362         | IgG1    | PE           | BD Biosciences          |                                        |

765

766

767



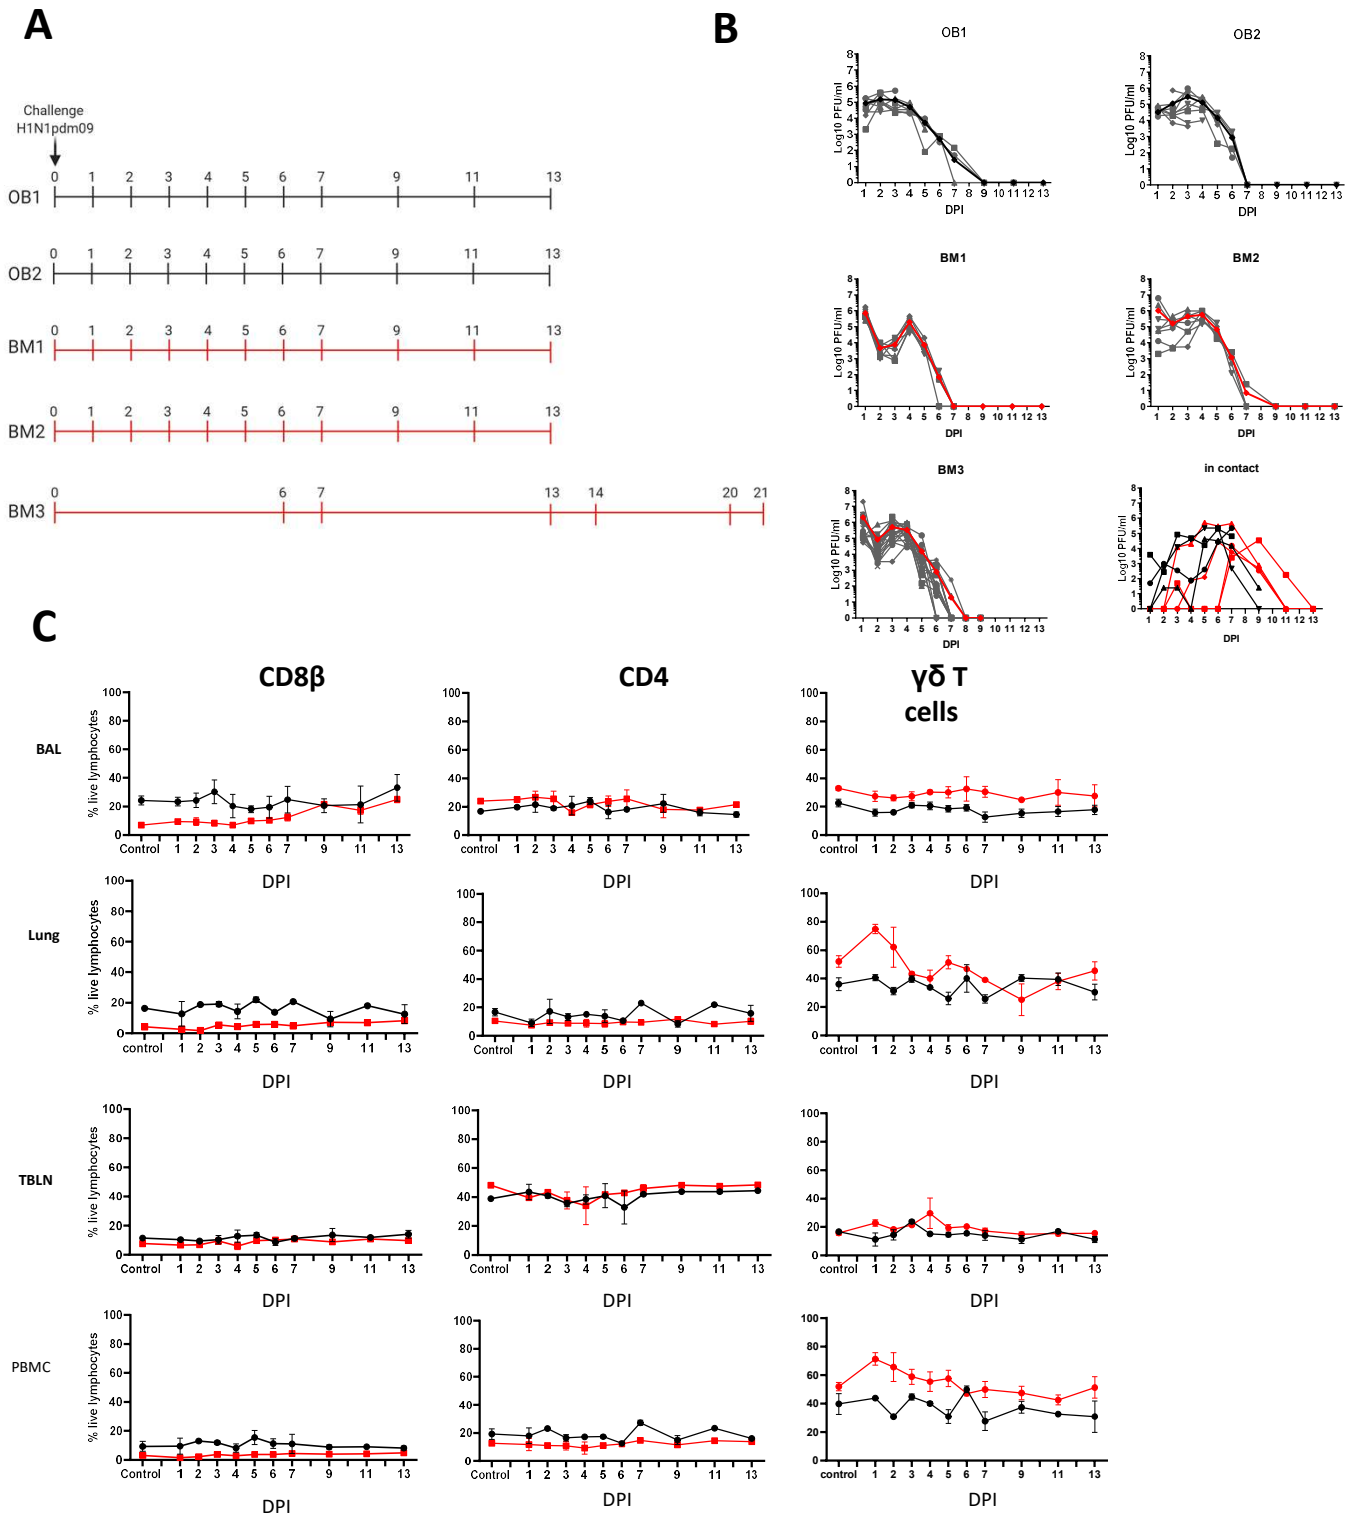

**Figure 1. Experimental design, viral load and cell subset dynamics following H1N1 pdm09 infection.** (A) Pigs were infected with H1N1pdm09 and culled on the days indicated. Two experiments with outbred (OB1 and OB2, black line) and two with inbred Babraham pigs (BM1 and BM2, red line) were performed. Two in-contact animals were included in each experiment one culled at day 11 and one at day 13 post infection. An extended time course of 21 days was performed with 18 inbred Babraham pigs (BM3, red line) with animals culled on the indicated days. (B) Virus load was determined by plaque assay of daily nasal swabs at the indicated time points. The thick line indicate the mean. (C) Proportions of CD4, CD8 and  $\gamma\delta$  cells were determined by flow cytometry at the indicated time points.

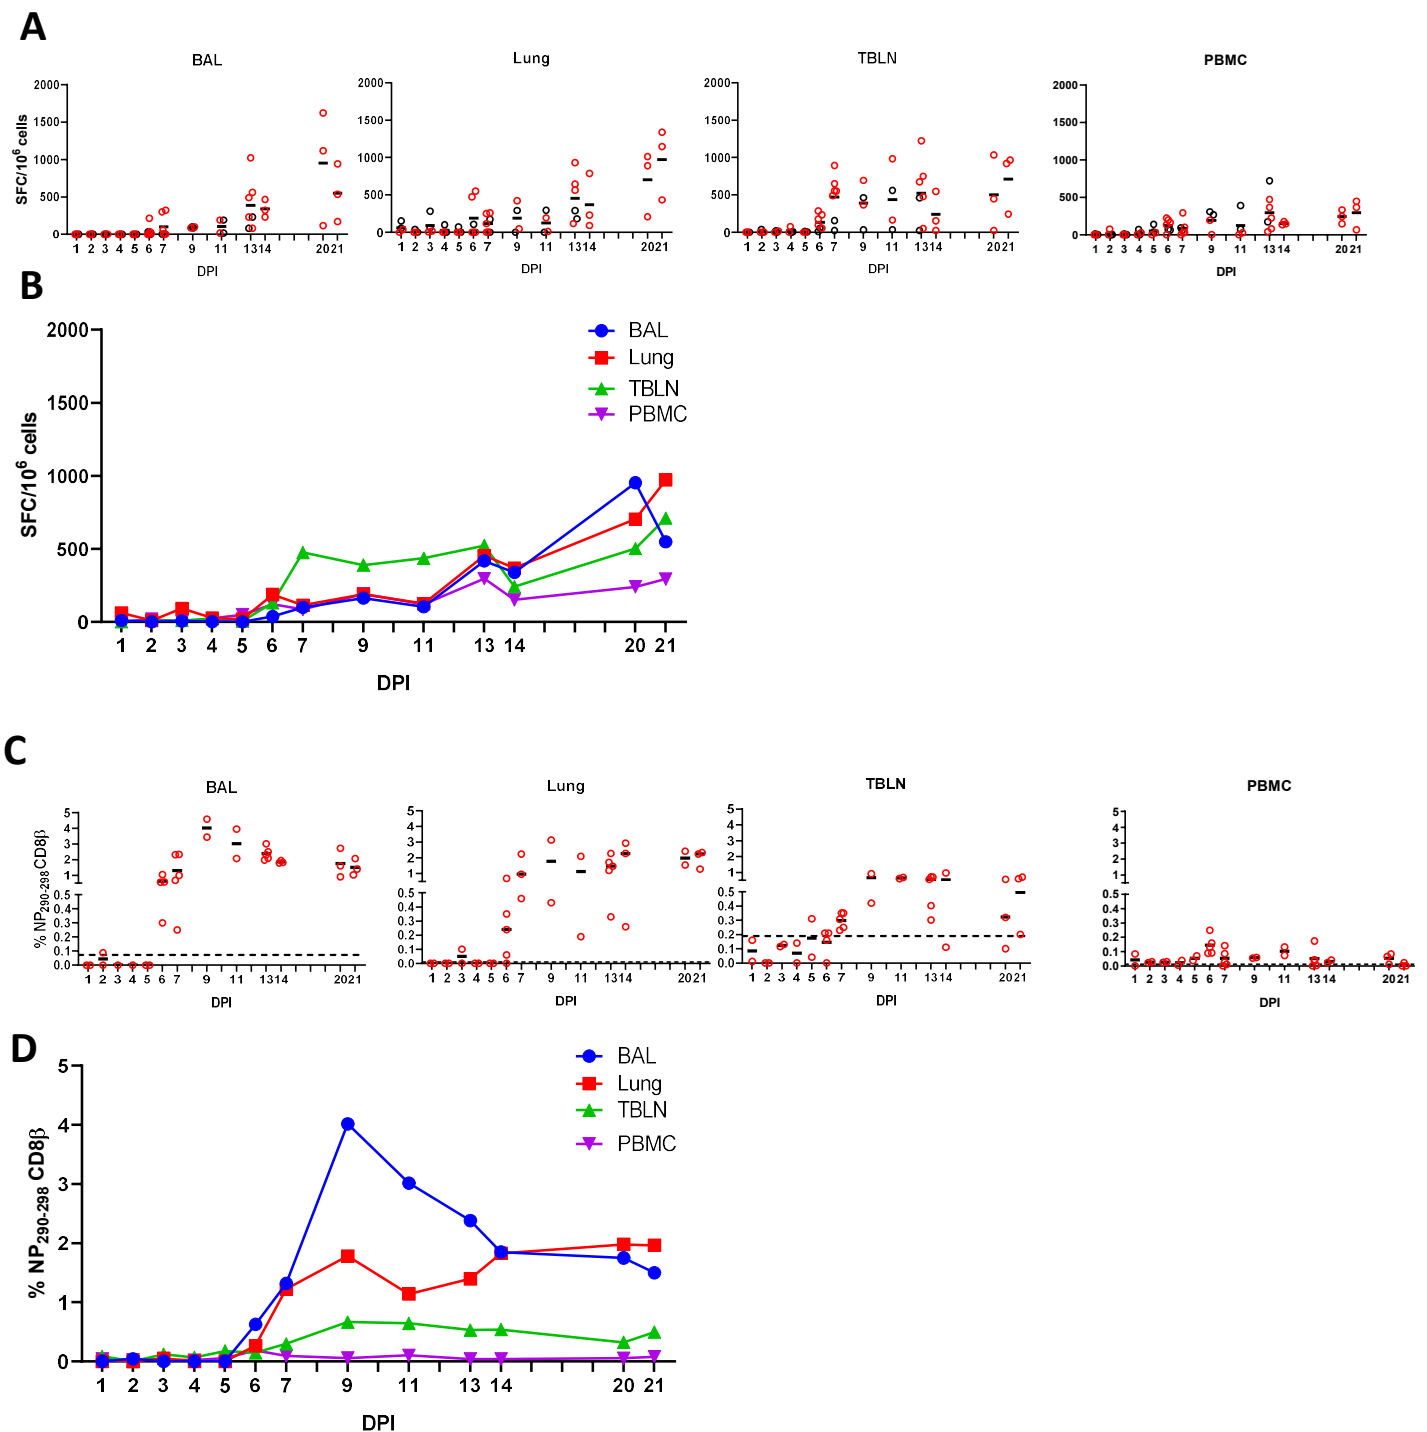

**Figure 2. IFN $\gamma$  ELISpot and tetramer responses. (A,B)** IFN $\gamma$  secreting spot forming cells (SFC) in BAL, lung, TBLN and PBMC in outbred (black circles) and inbred (red circles) pigs were enumerated after stimulation with H1N1pdm09 or medium control. **(B)** The mean percentages for each population are shown. DPI 1 to 7, 9, 11 and 13 each show results from 2 outbred and 2 inbred pigs. DPI 6, 7, 13, 14, 20 and 21 also include results from 3 additional inbred pigs. **(C, D)** Proportions of NP<sub>290-298</sub> CD8 T cells in tissues. Background staining with SLA matched tetramers containing irrelevant peptide has been subtracted. Dotted lines indicates proportions of tetramer positive cells in uninfected animals. Data from 2 outbred and 2 inbred pigs is shown for days 1 to 5 and 9 to 11. DPI 6, 7, 13, 14, 20 and 21 show data from 3 additional inbred pigs. Data in C and D is from 2 pigs (DPI 1-5, 9, 11), 3 pigs (DPI 14, 20, 21) or 5 pigs (DPI 6, 7 and 13).

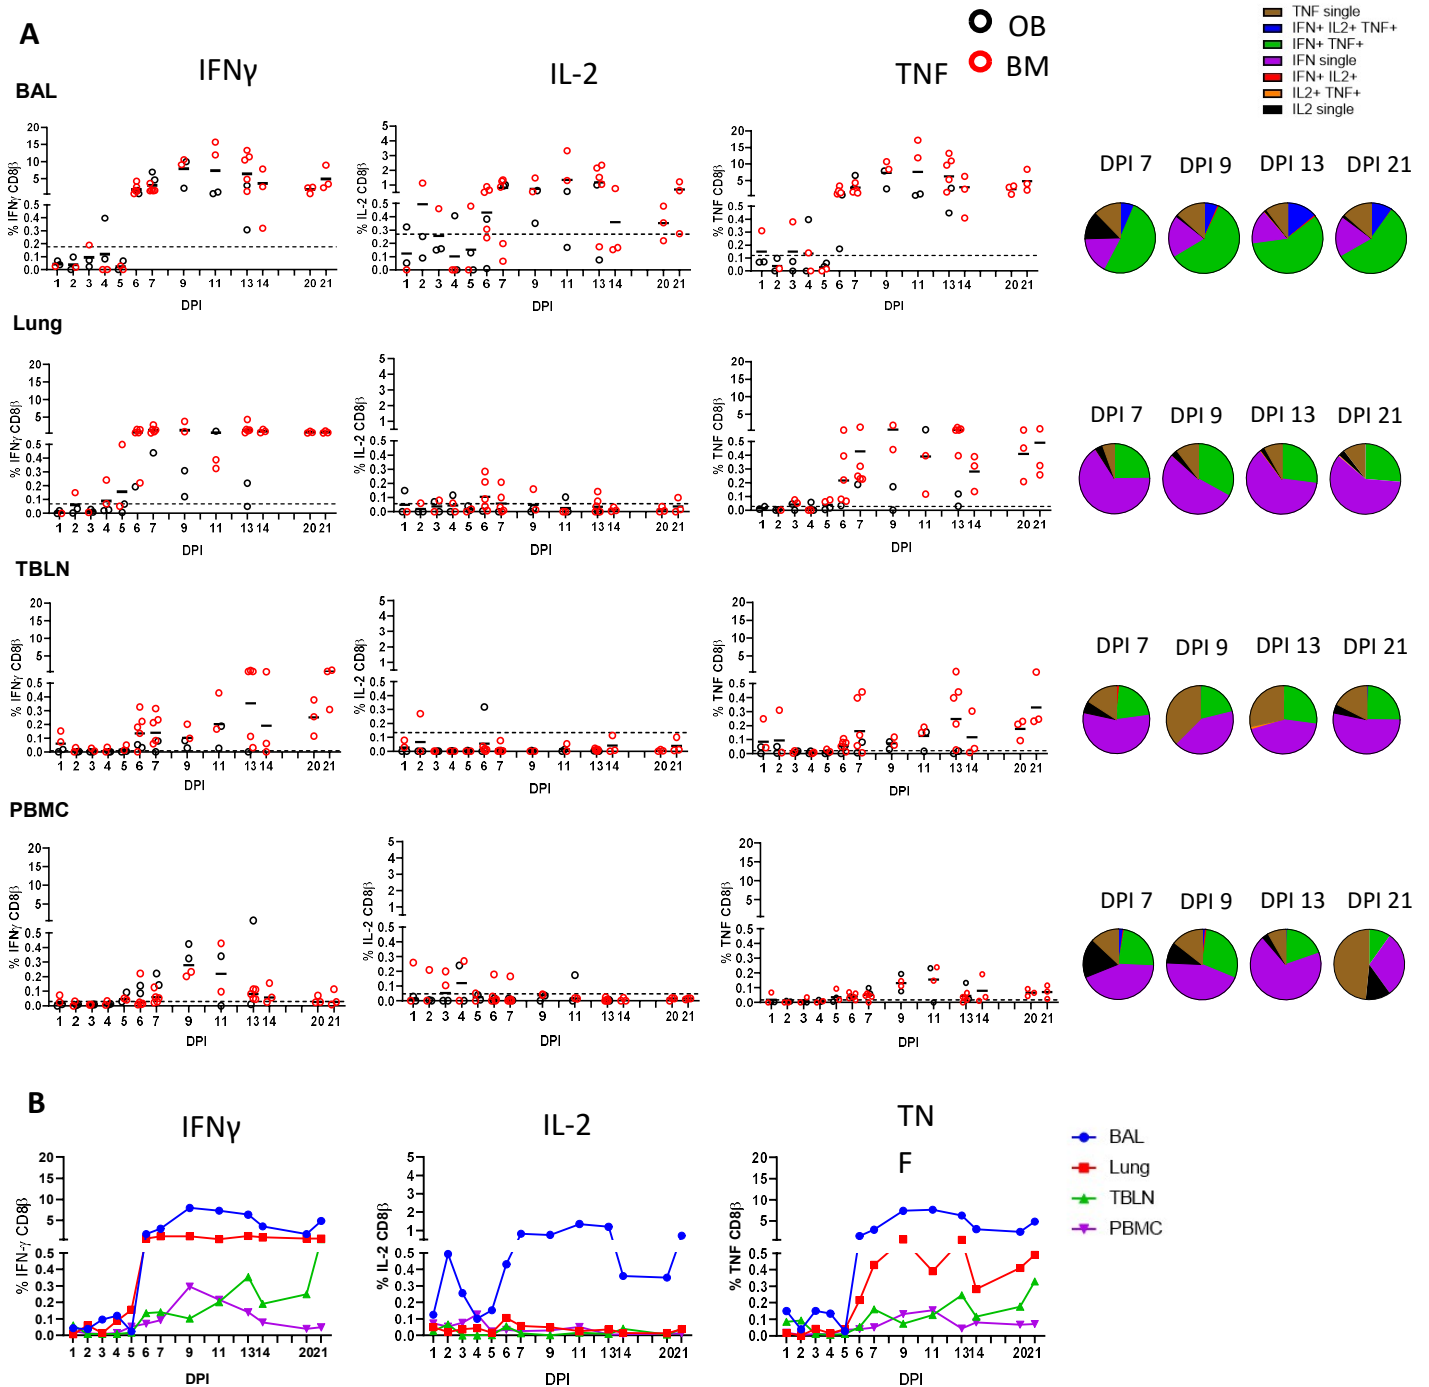

**Figure 3. CD8 $\beta$  T cell cytokine responses. (A)** Cytokine response of CD8 $\beta$  T cells in outbred (black circles) and inbred (red circles) pigs at each time point following influenza infection. BAL, lung, TBLN or PBMC cells were stimulated with H1N1pdm09 and cytokine secretion measured using intracytoplasmic staining. The mean of the 22 uninfected control animals is represented by a dotted line. DPI 1 to 7, 9, 11 and 13 each show results from 2 outbred and 2 inbred pigs. DPI 6, 7, 13, 14, 20 and 21 also include results from 3 additional inbred pigs. Pie charts show the proportion of single, double and triple cytokine secreting CD8 T cells for IFN $\gamma$ , TNF and IL-2 at 7, 9, 13 and 21 DPI. **(B)** The mean percentages for IFN $\gamma$ , TNF and IL-2 in each tissue for both OB and BM together are shown over the time course.

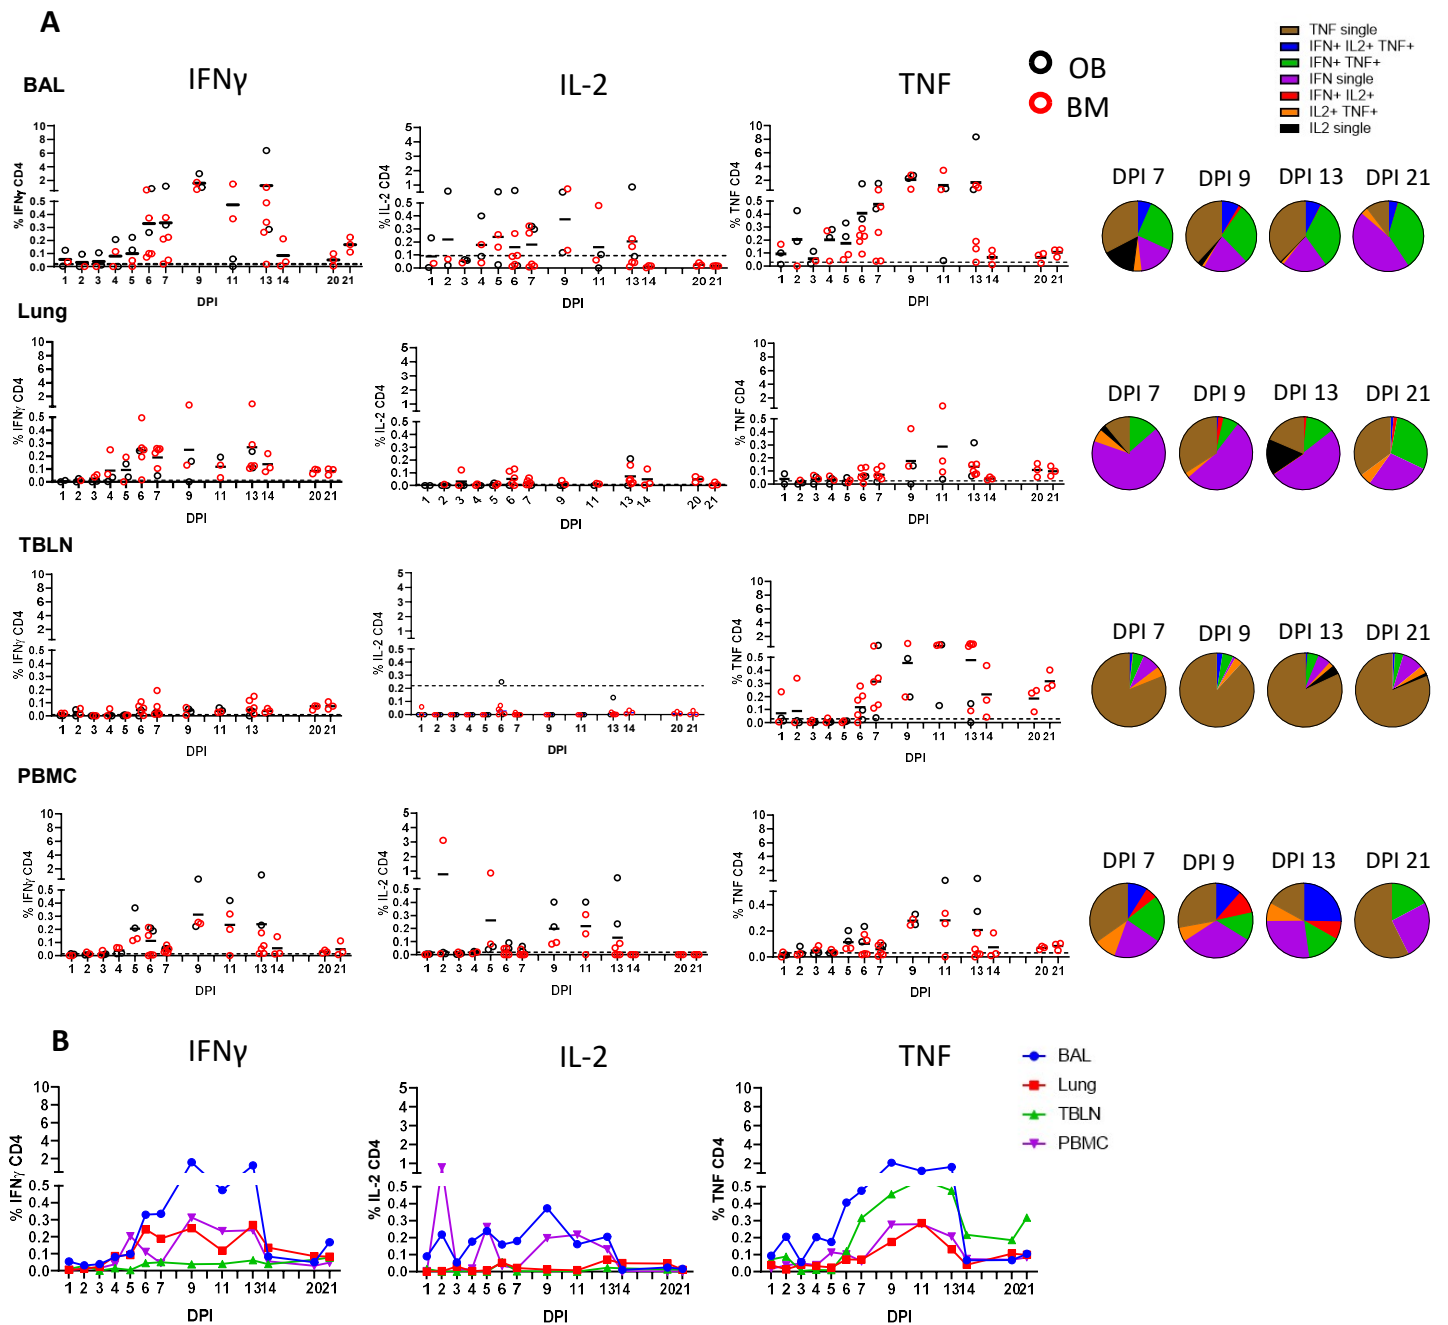

**Figure 4. CD4 T cell cytokine responses. (A)** Cytokine response of CD4 T cells in outbred (black circles) and inbred (red circles) pigs at each time point following influenza infection. BAL, lung, TBLN or PBMC cells were stimulated with H1N1pdm09 and cytokine secretion measured using intra-cytoplasmic staining. The mean of the 22 uninfected control animals is represented by a dotted line.

DPI 1 to 7, 9, 11 and 13 each show results from 2 outbred and 2 inbred pigs. DPI 6, 7, 13, 14, 20 and 21 also include results from 3 additional inbred pigs. Pie charts show the proportion of single, double and triple cytokine secreting CD8 T cells for IFN $\gamma$ , TNF and IL-2 at 7, 9, 13 and 21 DPI. **(B)** The mean percentages for IFN $\gamma$ , TNF and IL-2 in each tissue for OB and BM together are shown over the time course.

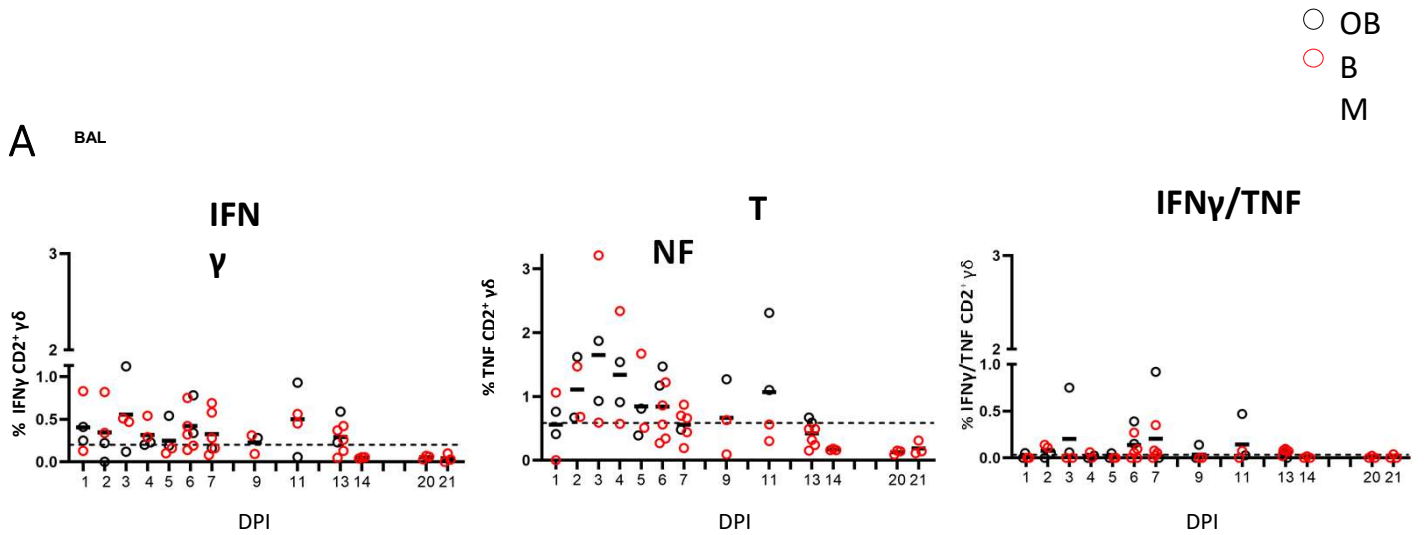

**Figure 5.  $\gamma\delta$  T cell *ex vivo* responses in BAL.** Cytokine response of  $\gamma\delta$  T cells in outbred (black circles) and inbred (red circles) pigs at each time point following H1N1pdm09 infection. IFN $\gamma$  and TNF production in BAL cells *ex vivo* without stimulation was measured using intracytoplasmic staining. The right hand panel shows the IFN $\gamma$ /TNF double producing cells. The mean of the 22 uninfected control animals is represented by a dotted line. DPI 1 to 7, 9, 11 and 13 each show results from 2 outbred and 2 inbred pigs. DPI 6, 7, 13, 14, 20 and 21 also include results from 3 additional inbred pigs.

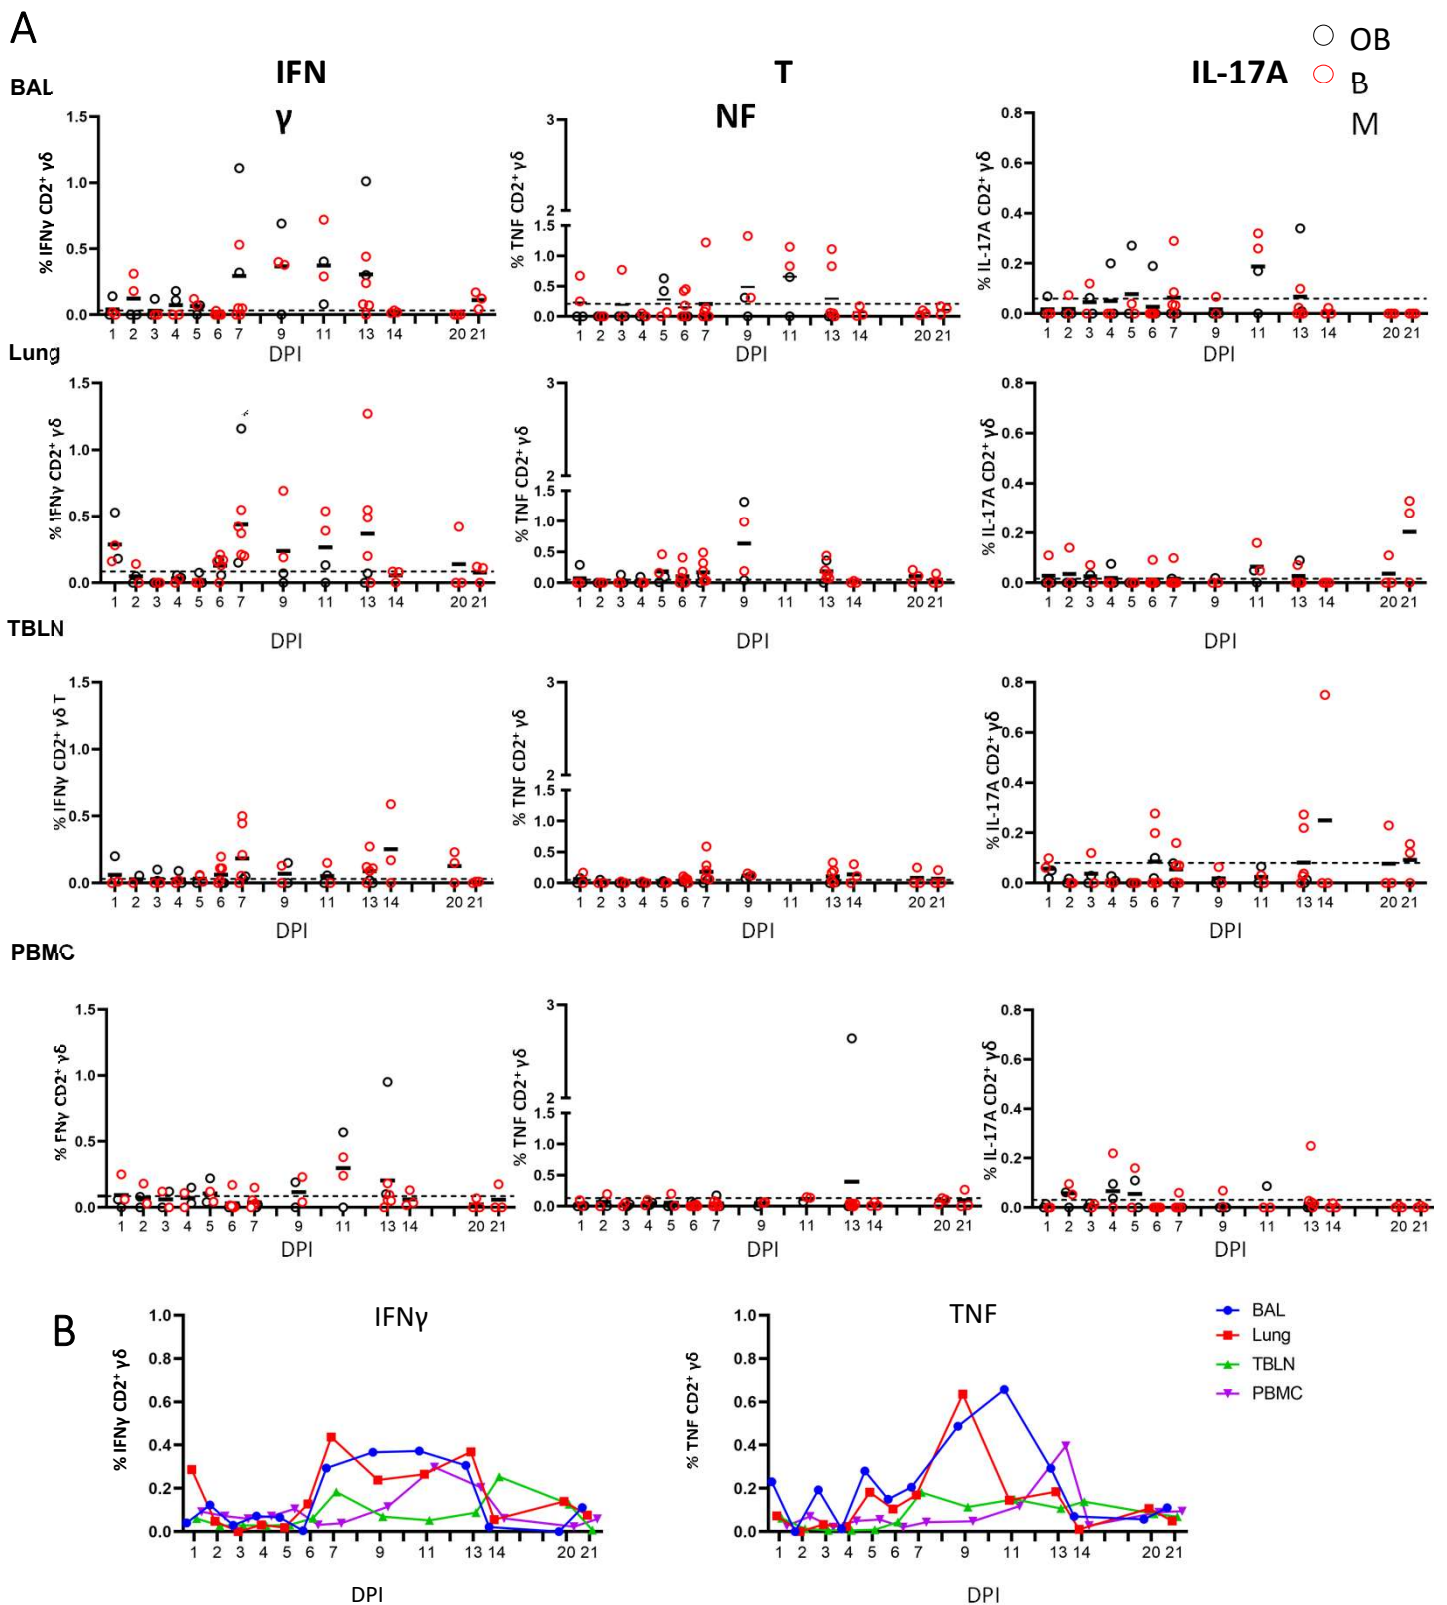

**Figure 6.  $\gamma\delta$  T cell responses after H1N1pdm09 stimulation. (A)** Frequencies of IFN $\gamma$ , TNF and IL-17A producing CD2 $^+$   $\gamma\delta$  T cells in outbred (black circles) and inbred (red circles) pigs following influenza infection. BAL, lung, TBLN and PBMC were stimulated with H1N1pdm09 and cytokine secretion measured using intra-cytoplasmic staining. The mean of the 22 uninfected control animals is represented by a dotted line. DPI 1 to 7, 9, 11 and 13 each show results from 2 outbred and 2 inbred pigs. DPI 6, 7, 13, 14, 20 and 21 also include results from 3 additional inbred pigs. **(B)** Mean percentages for IFN $\gamma$  and TNF in each tissue are shown over the time course.

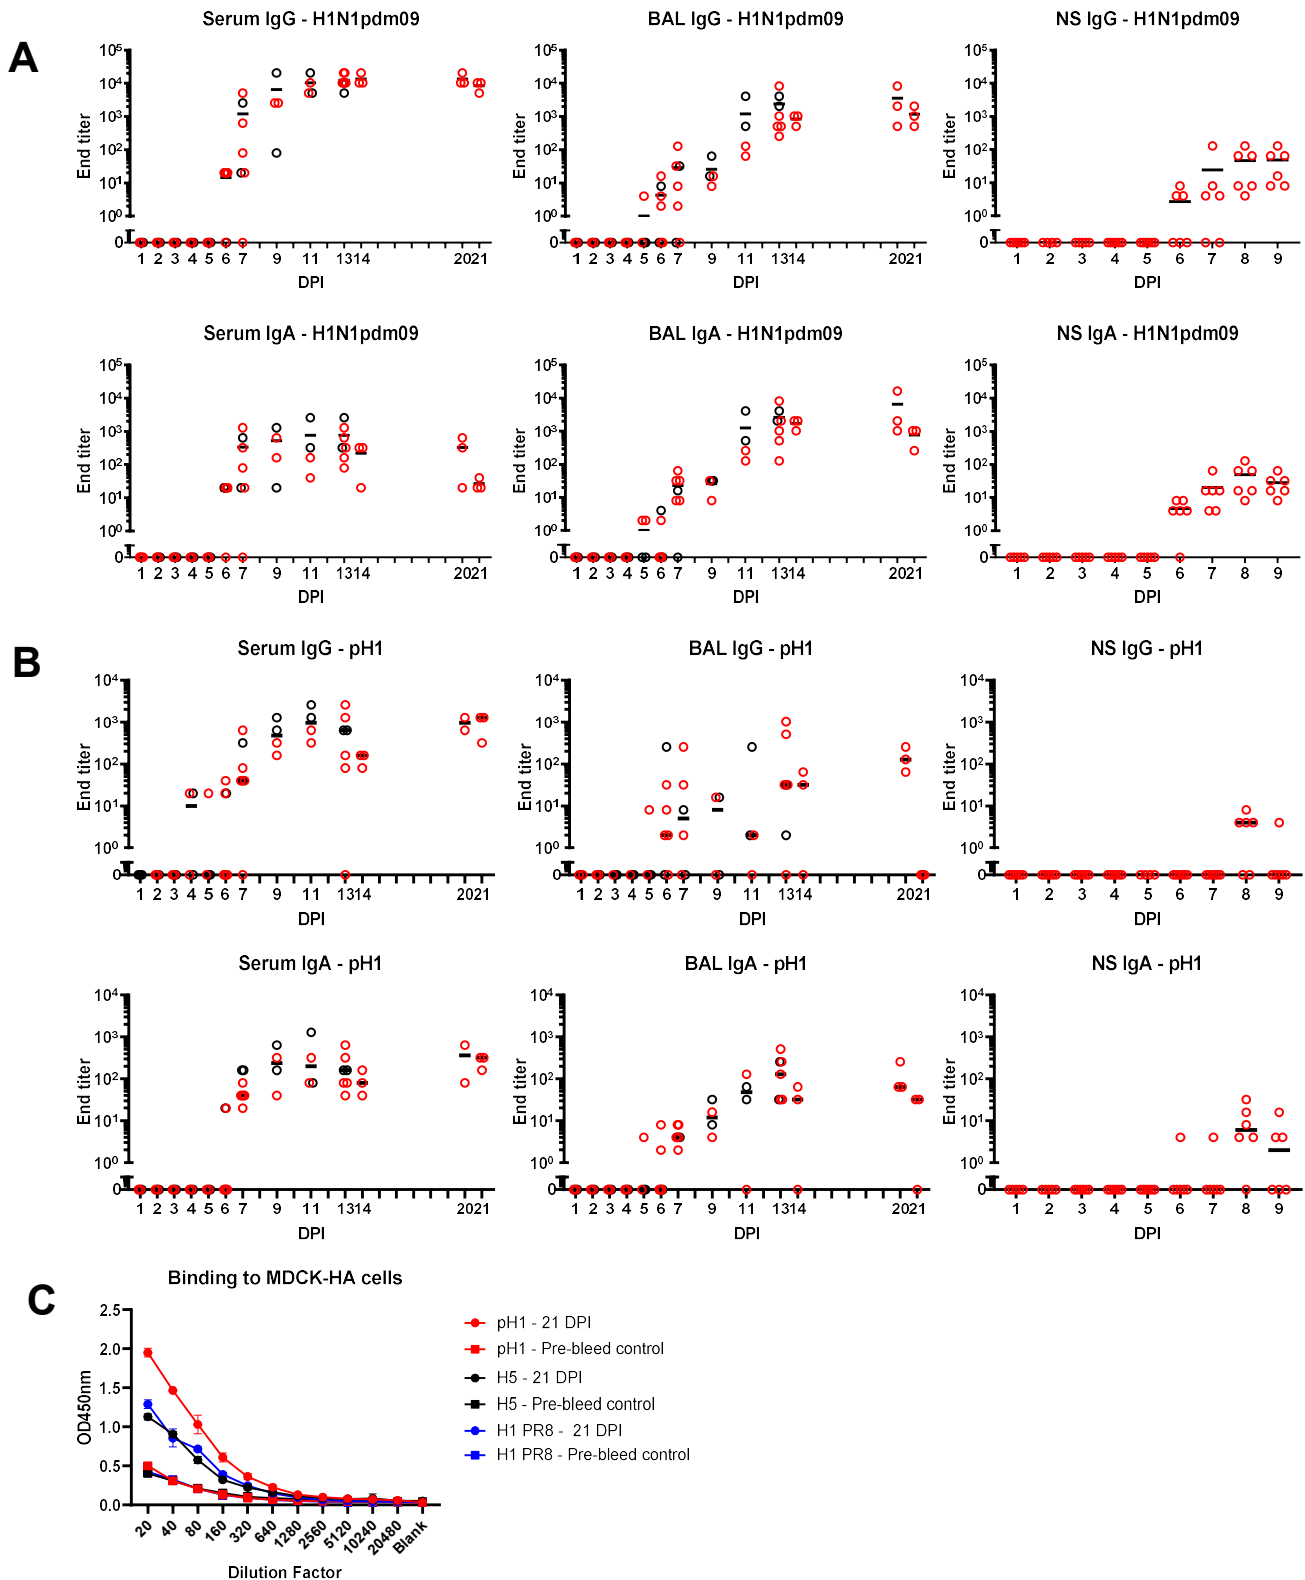

**Figure 7. Ab ELISA responses and binding to MDCK-HA expressing cells.** Influenza H1N1pdm09 virus specific IgA and IgG (**A**) and haemagglutinin (pHA) specific (**B**) responses in serum, BAL and nasal swabs (NS) were determined by ELISA and shown as black (for OB) and red (for BM) circles. (**C**) Binding of serum at 21 DPI to MDCK-pH1, MDCK-H1 PR8 and MDCK-H5 expressing cells.

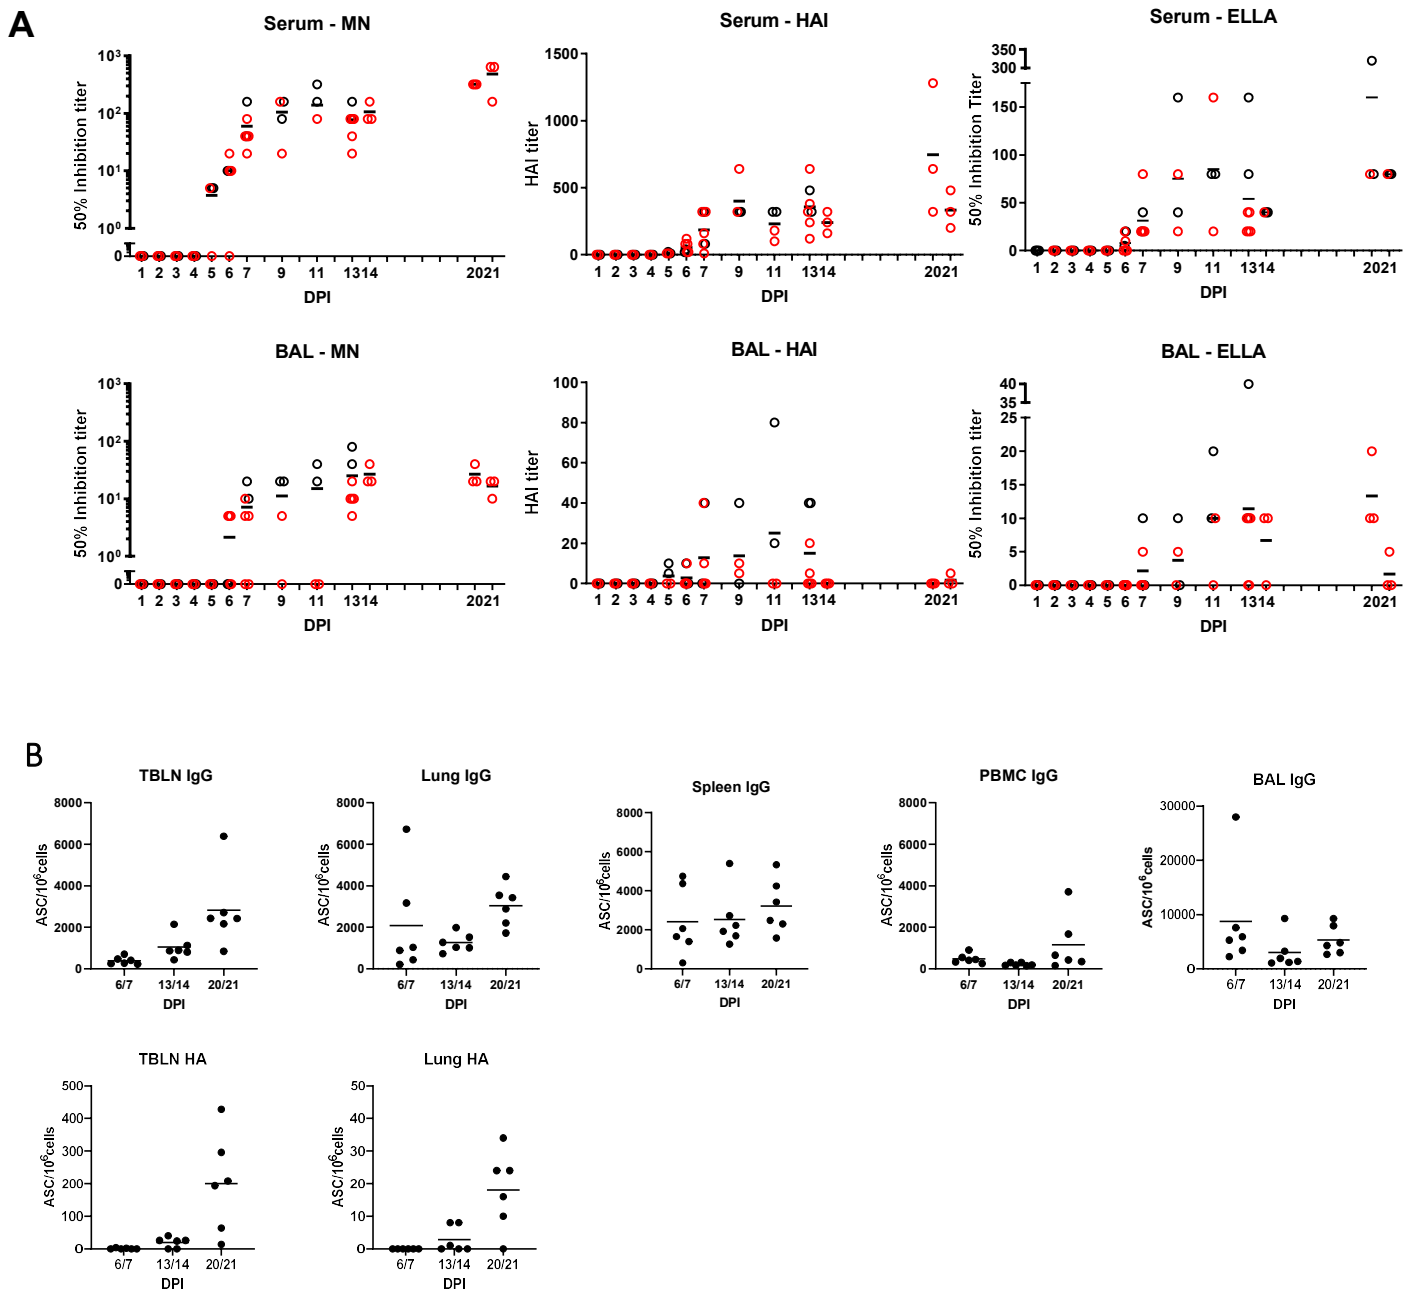



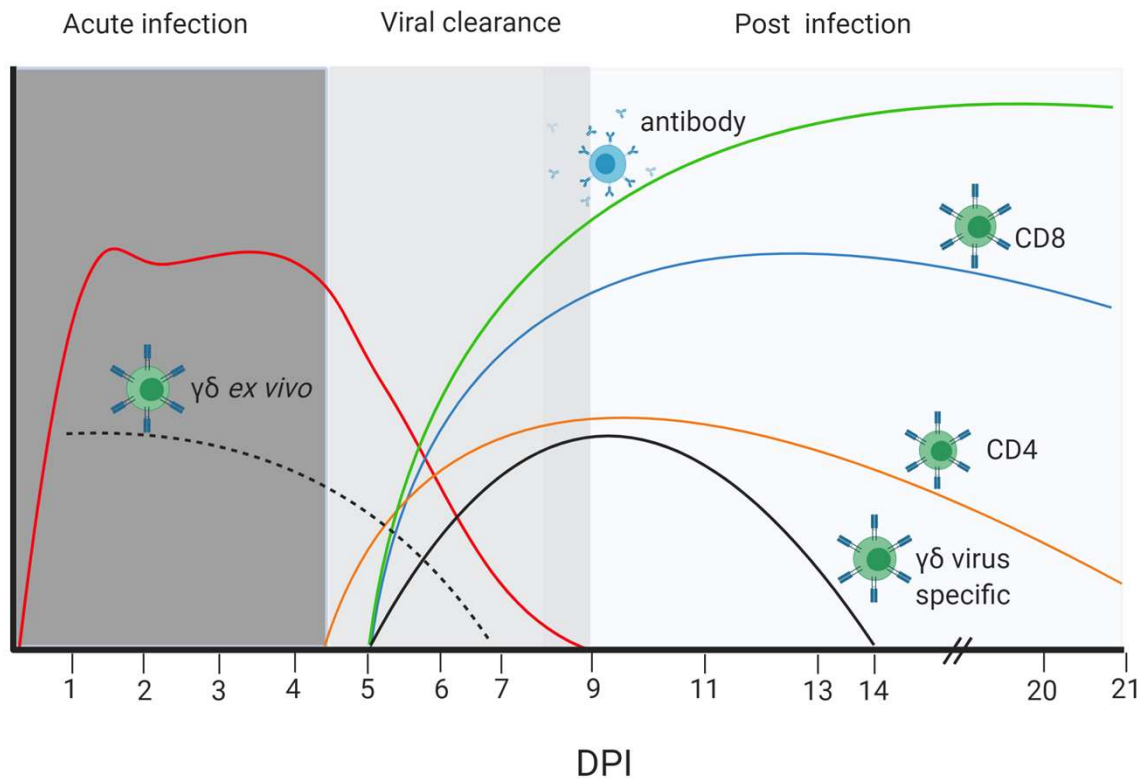

**Figure 9. Dynamics of viral load, T cell and Ab responses.** Stylised presentation of kinetics and magnitude of viral load and immune responses. The different colour lines represent the antibody and cellular responses as indicated, and the red line the virus load. The dotted black line represents *ex vivo* cytokine production by  $\gamma\delta$  cells, while the solid black line is the cytokine production by  $\gamma\delta$  cells re-stimulated with H1N1pdm09 virus *in vitro*. The figure was created with [BioRender.com](https://www.biorender.com).

## Supplementary Figure 1

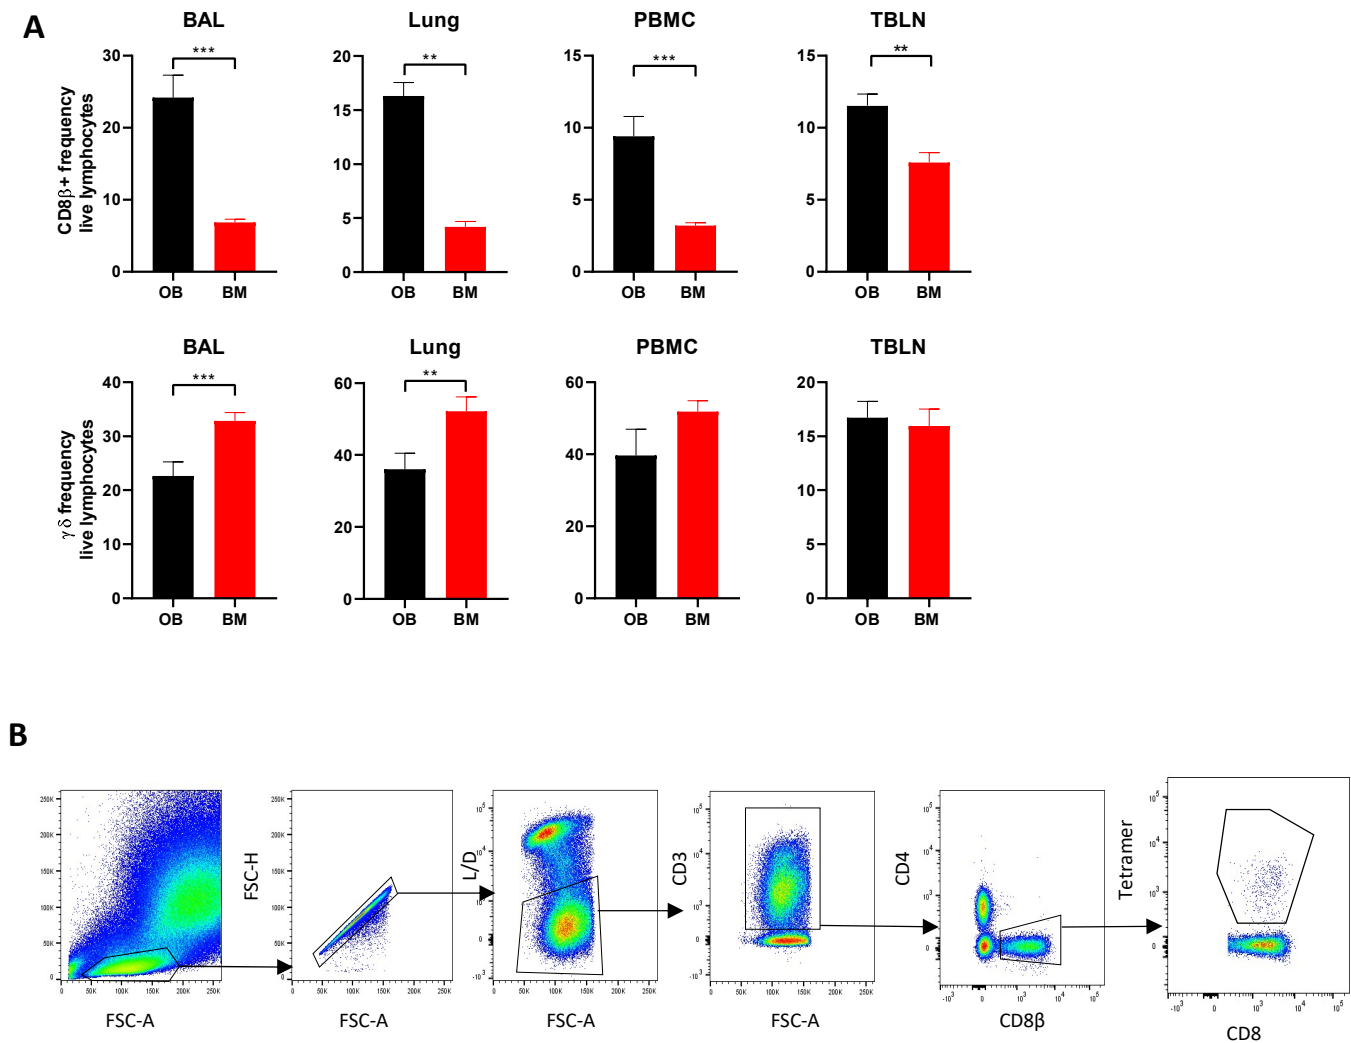

**Supplementary Figure 1. Proportion of CD8 cells in OB and BM and gating strategy for tetramer identification.** (A) Comparison of proportions of CD8 $\beta$  and  $\gamma\delta$  cells in control uninfected outbred (experiments OB1 and OB2) and inbred Babraham (experiments BM1 and BM2) pigs. Asterisks denote \*  $p \leq 0.05$ , \*\*  $\leq 0.005$ , \*\*\*  $\leq 0.0001$ . (B) Gating strategy for identification of NP<sub>290-298</sub> tetramer T cells. BAL, lung, TBLN and PBMC were stained with the relevant antibodies. Lymphocytes were gated by light scatter, followed by exclusion of doublets and dead cells. CD3<sup>+</sup>, CD4<sup>-</sup> CD8 $\beta$ <sup>+</sup> T cells were gates and the Tetramer<sup>+</sup> population enumerated as a percentage of CD8 $\beta$ <sup>+</sup> T cells.

## Supplementary Figure 2

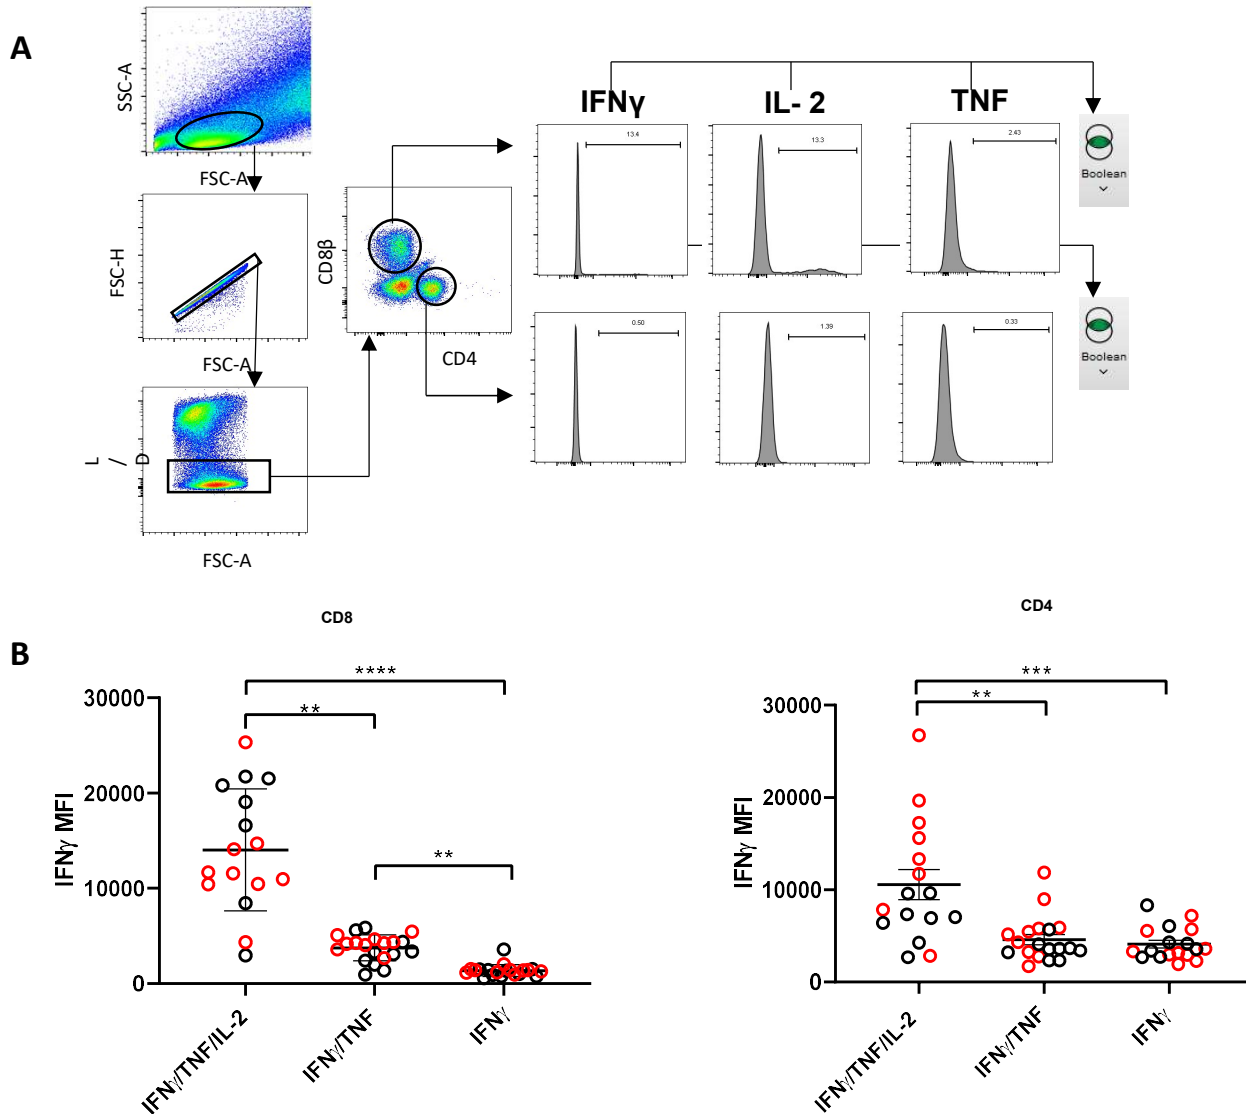

### Supplementary Figure 2: Gating strategy and cytokine production by CD8 and CD4 cells.

**(A)** Gating strategy for identification of CD8 $\beta$  and CD4 cytokine producing cells. BAL, lung, TBLN and PBMC were stimulated with H1N1pdm09, followed by intracytoplasmic staining. Lymphocytes were gated by light scatter and further sub-gated for exclusion of dead cells with a live/ dead discrimination dye. CD8 $\beta$  or CD4 cells were gated and expression of IFN $\gamma$ , TNF or IL-2 was determined by histogram. Boolean gating of all cytokine positive cells was performed and cytokine responses determined by summing the total cytokine production in single, double and triple producing cells. **(B)** MFI of IFN $\gamma$  secretion was determined in CD8 $\beta$  and CD4 cells identified as IFN $\gamma$  single, IFN $\gamma$ /TNF double or IFN $\gamma$ /TNF/IL-2 triple secreting T cells. IFN $\gamma$  MFI is plotted for BM (red circles) and OB (black circles) animal. Asterisk indicates \*p<0.05, \*\*p<0.01 and \*\*\*p < 0.001.

## Supplementary Figure 3

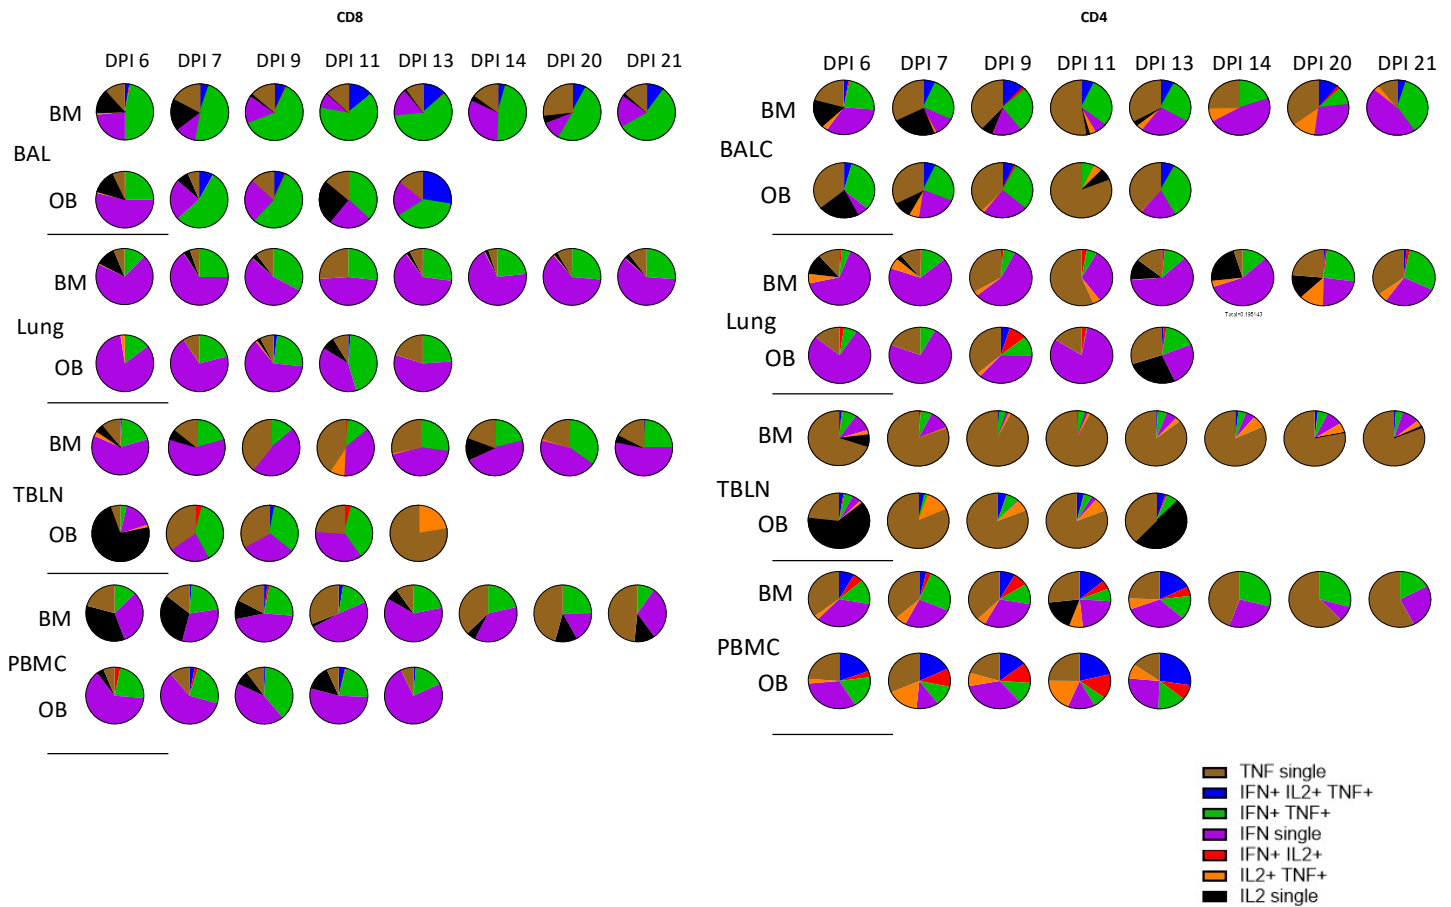

**Supplementary Figure 3. Cytokine production by CD8 $\beta$  and CD4 cells.** Boolean gating of cytokine producing CD8 and CD4 T cells in tissues. Pie charts depict the proportion of single, double and triple IFN $\gamma$ , IL-2 and TNF cytokine producing cells as a proportion of the total cytokine production in BAL, lung, TBLN and PBMC. Cytokine response for 6, 7, 9, 13 and 21 DPI for both OB and BM are shown. Medium control was subtracted from each stimulated population.

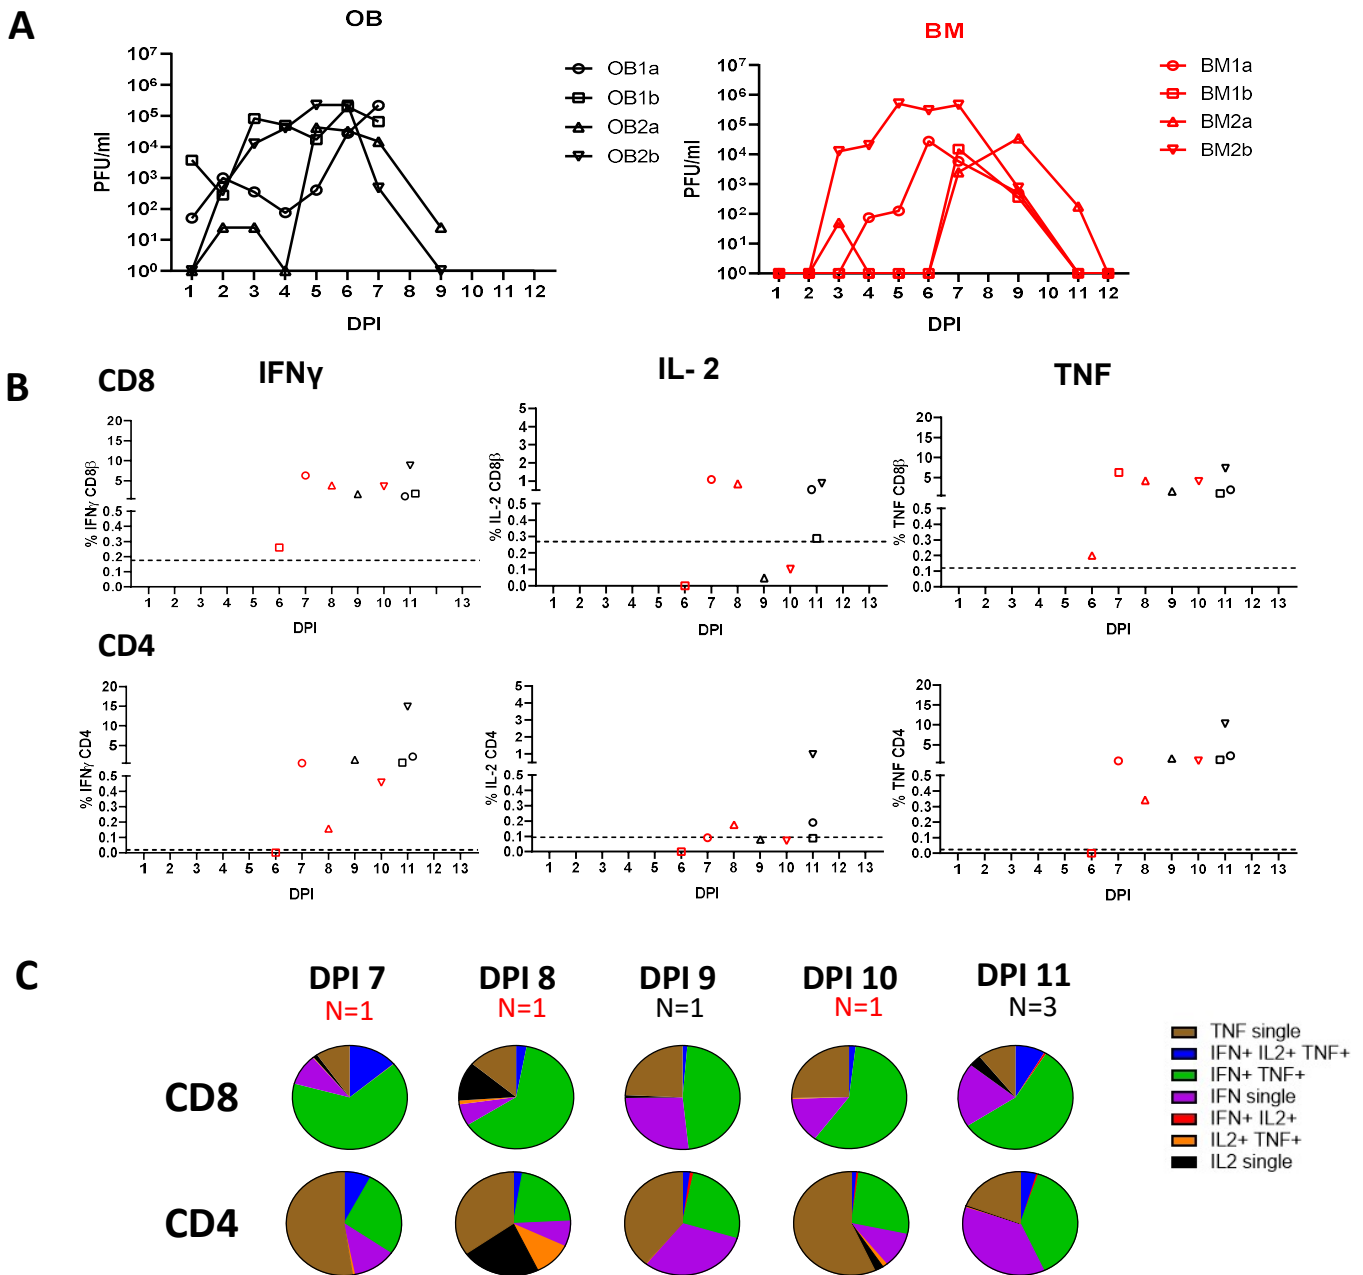

**Supplementary Figure 4: CD8 $\beta$  and CD4 cytokine response in BAL of in-contact animals.** (A) Virus load in in-contact animals was determined by plaque assay of daily nasal swabs at the indicated time points for outbred (black) and inbred Babraham (red) pigs. (B) BAL CD4 and CD8 cytokine responses were determined by intracytoplasmic staining and shown as the days post infection counting from the first day the animal shed virus. (C) Pie charts show the proportion of single, double and triple cytokine secreting CD8 T cells for IFN $\gamma$ , TNF and IL-2.

## Supplementary Figure 5

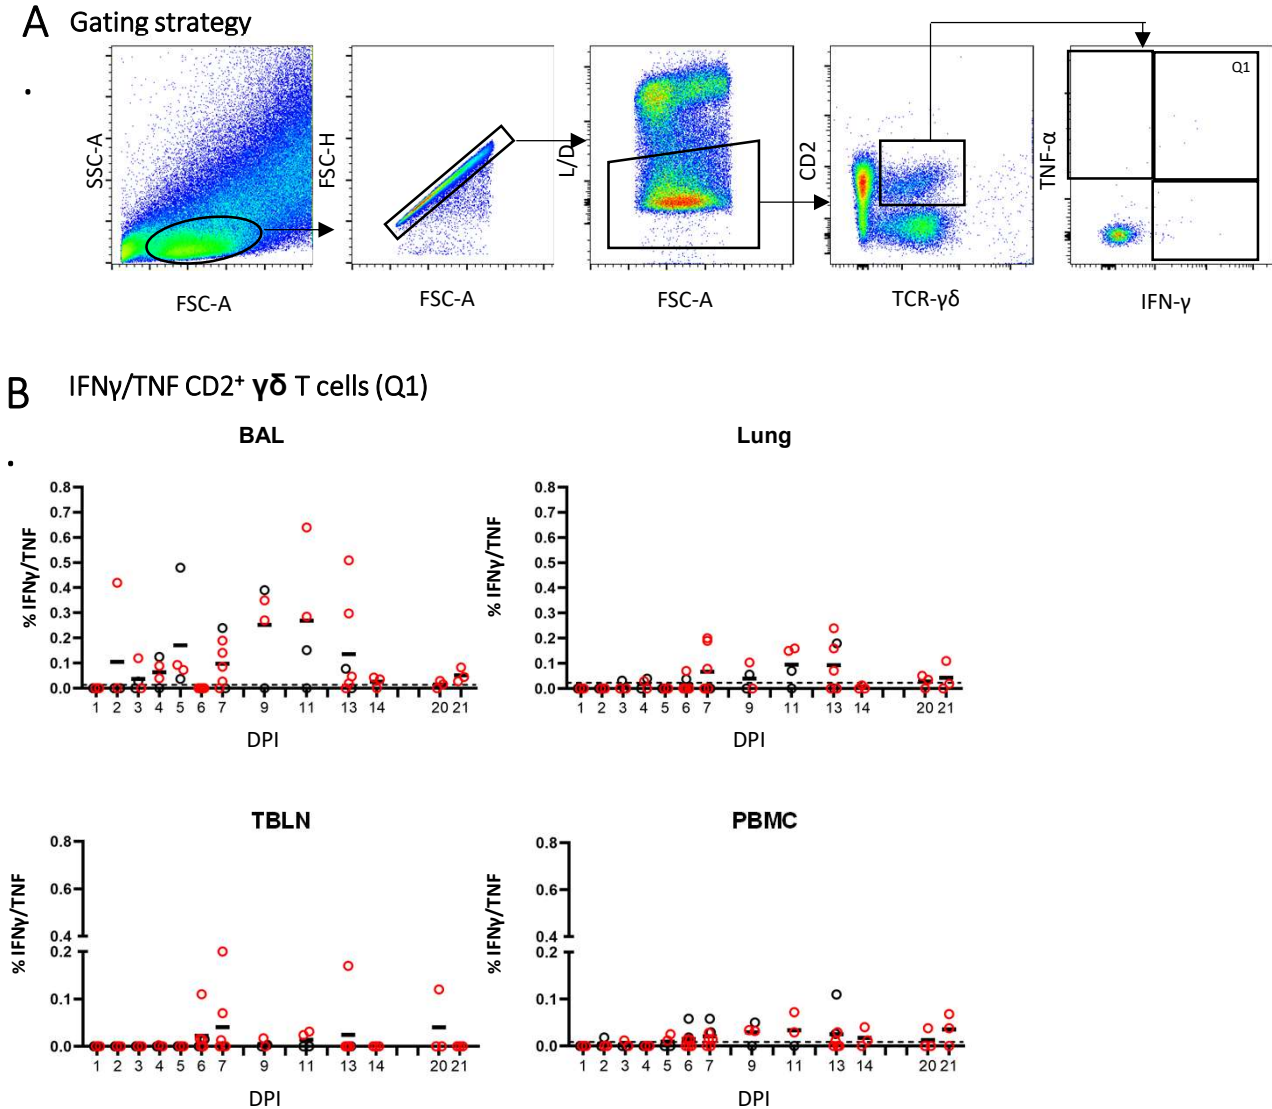

**Supplementary Figure 5. Double cytokine producing  $\gamma\delta$  cells after H1N1pdm09 stimulation.** (A) Lymphocytes were gated by light scatter properties and further sub-gated for exclusion of doublets and dead cells with a live/ dead discrimination dye. The CD2 $^+$   $\gamma\delta$  T cells were analyzed for co-production of IFN $\gamma$ /TNF (Q1). (B) Frequency of IFN $\gamma$ /TNF co-producing CD2 $^+$   $\gamma\delta$  T cells in outbred (black circles) and inbred (red circles) pigs following influenza infection. BAL, lung, TBLN and PBMC cells were stimulated overnight with H1N1pdm09 followed by intracellular cytokine staining. DPI 1 to 7, 9, 11 and 13 each show results from 2 outbred and 2 inbred pigs. DPI 6, 7, 13, 14, 20 and 21 also include results from 3 additional inbred pigs. The mean of the 22 uninfected control animals is represented by a dotted line.

## Supplementary Figure 6

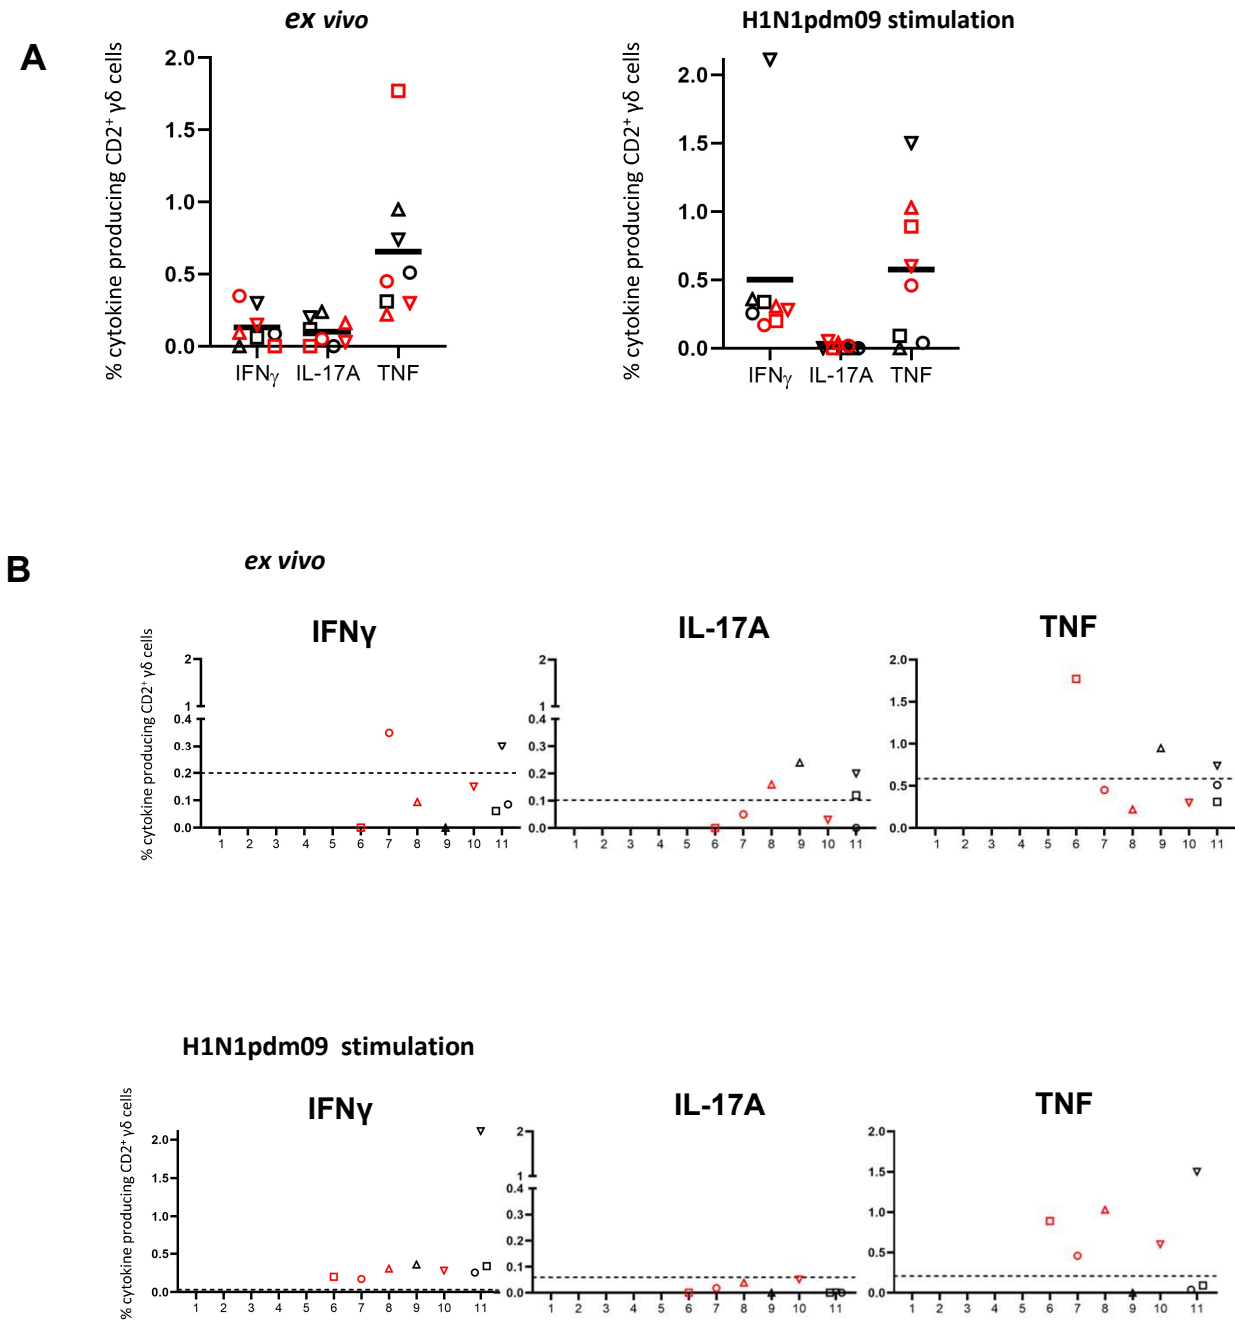

**Supplementary Figure 4: BAL cytokine response in  $\gamma\delta$  cells of in-contact animals. (A)** Proportions of IFN $\gamma$ , TNF and IL-17 cytokine producing cells in all in-contacts and **(B)** at each time point after infection for the individual in-contact animals shown as the days post infection counting from the first day the animal shed virus.
